# Supplementary material for: Digestion proteomics: tracking lactoferrin truncation and peptide release during simulated gastric digestion
Source: Royal Society of Chemistry journal article supplement (doi:10.1039/c4fo00165f), 2014-01-01
Supplement: c4fo00165f1.xlsx [file c4fo00165f1.xlsx]

## Sheet: Supplementary data
	Unpasteurised lactoferrin (mean results)												Unpasteurised lactoferrin (mean results)											Pasteurised lactoferrin relative to unpasteurised lactoferrin												Pasteurised lactoferrin relative to unpasteurised lactoferrin
																								Positive result (pink) = higher relative abundance in pasteurised												Positive result red/orange = higher relative abundance in pasteurised
																								Negative result (green) = higher relative abundance in unpasteurised												Similar result (yellow) = no large difference between pasteurised and unpasteurised
																																				Negative result (green) = higher relative abundance in unpasteurised
Position	0	0.5	2	5	10	20	30	60				Position	0	0.5	2	5	10	20	30	60			Position	0	0.5	2	5	10	20	30	60				Position	0	0.5	2	5	10	20	30	60
62	0.03	0.03	0.06	0.14	0.15	0.2	0.19	0.2	L			62	0	0	0	0	0	0	0	0	L		62									L			62									L
63	0.03	0.03	0.06	0.14	0.15	0.2	0.19	0.2	E			63	0	0	0	0	0	0	0	0	E		63									E			63									E
64	0.03	0.03	0.06	0.14	0.15	0.2	0.19	0.2	C			64	0	0	0	0	0	0	0	0	C		64									C			64									C
65	0.03	0.03	0.06	0.14	0.15	0.2	0.19	0.2	R			65	0	0	0	0	0	0	0	0	R		65									R			65									R
66	0.03	0.03	0.06	0.14	0.15	0.2	0.19	0.2	I			66	0	0	0	0	0	0	0	0	I		66									I			66									I
67	0.03	0.03	0.06	0.14	0.15	0.2	0.19	0.2	R			67	0	0	0	0	0	0	0	0	R		67									R			67									R
68	0.0159681	0.0578842	0.117764	0.0938124	0.157685	0.177645	0.197605	0.181637	A			68	0.0106501	0.0560857	0.0811628	0.156227	0.173593	0.16837	0.195027	0.158884	A		68	0.00531799	0.0017985	0.0366017	-0.0624147	-0.0159087	0.00927425	0.00257784	0.0227531	A			68	0.00531799	0.0017985	0.0366017	-0.0624147	-0.0159087	0.00927425	0.00257784	0.0227531	A
69	0.0159681	0.0578842	0.117764	0.0938124	0.157685	0.177645	0.197605	0.181637	I			69	0.0106501	0.0560857	0.0811628	0.156227	0.173593	0.16837	0.195027	0.158884	A		69	0.00531799	0.0017985	0.0366017	-0.0624147	-0.0159087	0.00927425	0.00257784	0.0227531	A			69	0.00531799	0.0017985	0.0366017	-0.0624147	-0.0159087	0.00927425	0.00257784	0.0227531	A
70	0.0159681	0.0578842	0.117764	0.0938124	0.157685	0.177645	0.197605	0.181637	E			70	0.0106501	0.0560857	0.0811628	0.156227	0.173593	0.16837	0.195027	0.158884	E		70	0.00531799	0.0017985	0.0366017	-0.0624147	-0.0159087	0.00927425	0.00257784	0.0227531	E			70	0.00531799	0.0017985	0.0366017	-0.0624147	-0.0159087	0.00927425	0.00257784	0.0227531	E
71	0.0157143	0.0614286	0.124286	0.112857	0.158571	0.174286	0.185714	0.167143	K			71	0.00979985	0.0570177	0.0720127	0.159941	0.186296	0.178857	0.165027	0.171048	K		71	0.00591444	0.00441087	0.0522731	-0.0470842	-0.0277248	-0.00457161	0.0206875	-0.0039053	K			71	0.00591444	0.00441087	0.0522731	-0.0470842	-0.0277248	-0.00457161	0.0206875	-0.0039053	K
72	0.0157143	0.0614286	0.124286	0.112857	0.158571	0.174286	0.185714	0.167143	K			72	0.00979985	0.0570177	0.0720127	0.159941	0.186296	0.178857	0.165027	0.171048	K		72	0.00591444	0.00441087	0.0522731	-0.0470842	-0.0277248	-0.00457161	0.0206875	-0.0039053	K			72	0.00591444	0.00441087	0.0522731	-0.0470842	-0.0277248	-0.00457161	0.0206875	-0.0039053	K
73	0.0157143	0.0614286	0.124286	0.112857	0.158571	0.174286	0.185714	0.167143	A			73	0.00979985	0.0570177	0.0720127	0.159941	0.186296	0.178857	0.165027	0.171048	A		73	0.00591444	0.00441087	0.0522731	-0.0470842	-0.0277248	-0.00457161	0.0206875	-0.0039053	A			73	0.00591444	0.00441087	0.0522731	-0.0470842	-0.0277248	-0.00457161	0.0206875	-0.0039053	A
74	0.0157143	0.0614286	0.124286	0.112857	0.158571	0.174286	0.185714	0.167143	D			74	0.00979985	0.0570177	0.0720127	0.159941	0.186296	0.178857	0.165027	0.171048	D		74	0.00591444	0.00441087	0.0522731	-0.0470842	-0.0277248	-0.00457161	0.0206875	-0.0039053	D			74	0.00591444	0.00441087	0.0522731	-0.0470842	-0.0277248	-0.00457161	0.0206875	-0.0039053	D
75	0.0157143	0.0614286	0.124286	0.112857	0.158571	0.174286	0.185714	0.167143	A			75	0.00979985	0.0570177	0.0720127	0.159941	0.186296	0.178857	0.165027	0.171048	A		75	0.00591444	0.00441087	0.0522731	-0.0470842	-0.0277248	-0.00457161	0.0206875	-0.0039053	A			75	0.00591444	0.00441087	0.0522731	-0.0470842	-0.0277248	-0.00457161	0.0206875	-0.0039053	A
76	0.026	0.064	0.115	0.115	0.15	0.183	0.187	0.16	V			76	0.0103114	0.0618973	0.0648095	0.147766	0.184109	0.186399	0.162617	0.182091	V		76	0.0156886	0.00210269	0.0501905	-0.0327658	-0.034109	-0.0033988	0.0243831	-0.0220912	V			76	0.0156886	0.00210269	0.0501905	-0.0327658	-0.034109	-0.0033988	0.0243831	-0.0220912	V
77	0.026	0.064	0.115	0.115	0.15	0.183	0.187	0.16	T			77	0.0103114	0.0618973	0.0648095	0.147766	0.184109	0.186399	0.162617	0.182091	T		77	0.0156886	0.00210269	0.0501905	-0.0327658	-0.034109	-0.0033988	0.0243831	-0.0220912	T			77	0.0156886	0.00210269	0.0501905	-0.0327658	-0.034109	-0.0033988	0.0243831	-0.0220912	T
78	0.026973	0.0679321	0.116883	0.11988	0.148851	0.183816	0.190809	0.144855	L			78	0.0126598	0.0644242	0.0655132	0.144674	0.175672	0.183431	0.16961	0.184015	L		78	0.0143132	0.00350786	0.0513699	-0.0247943	-0.026821	0.000385187	0.021199	-0.0391599	L			78	0.0143132	0.00350786	0.0513699	-0.0247943	-0.026821	0.000385187	0.021199	-0.0391599	L
79	0.031	0.071	0.122	0.122	0.149	0.178	0.184	0.143	D			79	0.0152435	0.0694722	0.0694385	0.147343	0.173746	0.181752	0.16724	0.175764	D		79	0.0157565	0.00152779	0.0525615	-0.0253434	-0.0247464	-0.00375208	0.0167605	-0.0327644	D			79	0.0157565	0.00152779	0.0525615	-0.0253434	-0.0247464	-0.00375208	0.0167605	-0.0327644	D
80	0.031	0.071	0.122	0.122	0.149	0.178	0.184	0.143	G			80	0.0152435	0.0694722	0.0694385	0.147343	0.173746	0.181752	0.16724	0.175764	G		80	0.0157565	0.00152779	0.0525615	-0.0253434	-0.0247464	-0.00375208	0.0167605	-0.0327644	G			80	0.0157565	0.00152779	0.0525615	-0.0253434	-0.0247464	-0.00375208	0.0167605	-0.0327644	G
81	0.031	0.071	0.122	0.122	0.149	0.178	0.184	0.143	G			81	0.0152435	0.0694722	0.0694385	0.147343	0.173746	0.181752	0.16724	0.175764	G		81	0.0157565	0.00152779	0.0525615	-0.0253434	-0.0247464	-0.00375208	0.0167605	-0.0327644	G			81	0.0157565	0.00152779	0.0525615	-0.0253434	-0.0247464	-0.00375208	0.0167605	-0.0327644	G
82	0.031	0.071	0.122	0.122	0.149	0.178	0.184	0.143	M			82	0.0152435	0.0694722	0.0694385	0.147343	0.173746	0.181752	0.16724	0.175764	M		82	0.0157565	0.00152779	0.0525615	-0.0253434	-0.0247464	-0.00375208	0.0167605	-0.0327644	M			82	0.0157565	0.00152779	0.0525615	-0.0253434	-0.0247464	-0.00375208	0.0167605	-0.0327644	M
83	0.02	0.0655556	0.0977778	0.128889	0.148889	0.185556	0.212222	0.141111	V			83	0.0153365	0.0701463	0.0631887	0.134791	0.155846	0.181305	0.187247	0.192141	V		83	0.00466351	-0.00459078	0.0345891	-0.00590207	-0.00695675	0.00425097	0.0249757	-0.0510297	V			83	0.00466351	-0.00459078	0.0345891	-0.00590207	-0.00695675	0.00425097	0.0249757	-0.0510297	V
84	0.01998	0.0669331	0.0999001	0.123876	0.150849	0.187812	0.210789	0.13986	F			84	0.0143653	0.0680905	0.0638631	0.139489	0.166682	0.175496	0.179032	0.192983	F		84	0.00561473	-0.00115743	0.036037	-0.015613	-0.0158327	0.0123162	0.0317577	-0.0531224	F			84	0.00561473	-0.00115743	0.036037	-0.015613	-0.0158327	0.0123162	0.0317577	-0.0531224	F
85	0.0133185	0.0754717	0.103219	0.132075	0.153163	0.18202	0.208657	0.132075	E			85	0.00751909	0.0702034	0.0633222	0.150806	0.190947	0.167072	0.15363	0.196501	E		85	0.00579944	0.00526827	0.0398964	-0.0187301	-0.0377842	0.0149483	0.0550271	-0.0644252	E			85	0.00579944	0.00526827	0.0398964	-0.0187301	-0.0377842	0.0149483	0.0550271	-0.0644252	E
86	0.0133185	0.0754717	0.103219	0.132075	0.153163	0.18202	0.208657	0.132075	A			86	0.00751909	0.0702034	0.0633222	0.150806	0.190947	0.167072	0.15363	0.196501	A		86	0.00579944	0.00526827	0.0398964	-0.0187301	-0.0377842	0.0149483	0.0550271	-0.0644252	A			86	0.00579944	0.00526827	0.0398964	-0.0187301	-0.0377842	0.0149483	0.0550271	-0.0644252	A
87	0.0133185	0.0754717	0.103219	0.132075	0.153163	0.18202	0.208657	0.132075	G			87	0.00751909	0.0702034	0.0633222	0.150806	0.190947	0.167072	0.15363	0.196501	G		87	0.00579944	0.00526827	0.0398964	-0.0187301	-0.0377842	0.0149483	0.0550271	-0.0644252	G			87	0.00579944	0.00526827	0.0398964	-0.0187301	-0.0377842	0.0149483	0.0550271	-0.0644252	G
88	0.0133185	0.0754717	0.103219	0.132075	0.153163	0.18202	0.208657	0.132075	R			88	0.00751909	0.0702034	0.0633222	0.150806	0.190947	0.167072	0.15363	0.196501	R		88	0.00579944	0.00526827	0.0398964	-0.0187301	-0.0377842	0.0149483	0.0550271	-0.0644252	R			88	0.00579944	0.00526827	0.0398964	-0.0187301	-0.0377842	0.0149483	0.0550271	-0.0644252	R
89	0.0133185	0.0754717	0.103219	0.132075	0.153163	0.18202	0.208657	0.132075	D			89	0.00751909	0.0702034	0.0633222	0.150806	0.190947	0.167072	0.15363	0.196501	D		89	0.00579944	0.00526827	0.0398964	-0.0187301	-0.0377842	0.0149483	0.0550271	-0.0644252	D			89	0.00579944	0.00526827	0.0398964	-0.0187301	-0.0377842	0.0149483	0.0550271	-0.0644252	D
90	0.0133185	0.0754717	0.103219	0.132075	0.153163	0.18202	0.208657	0.132075	P			90	0.00751909	0.0702034	0.0633222	0.150806	0.190947	0.167072	0.15363	0.196501	P		90	0.00579944	0.00526827	0.0398964	-0.0187301	-0.0377842	0.0149483	0.0550271	-0.0644252	P			90	0.00579944	0.00526827	0.0398964	-0.0187301	-0.0377842	0.0149483	0.0550271	-0.0644252	P
91	0.0133185	0.0754717	0.103219	0.132075	0.153163	0.18202	0.208657	0.132075	Y			91	0.00751909	0.0702034	0.0633222	0.150806	0.190947	0.167072	0.15363	0.196501	Y		91	0.00579944	0.00526827	0.0398964	-0.0187301	-0.0377842	0.0149483	0.0550271	-0.0644252	Y			91	0.00579944	0.00526827	0.0398964	-0.0187301	-0.0377842	0.0149483	0.0550271	-0.0644252	Y
92	0.0133185	0.0754717	0.103219	0.132075	0.153163	0.18202	0.208657	0.132075	K			92	0.00751909	0.0702034	0.0633222	0.150806	0.190947	0.167072	0.15363	0.196501	K		92	0.00579944	0.00526827	0.0398964	-0.0187301	-0.0377842	0.0149483	0.0550271	-0.0644252	K			92	0.00579944	0.00526827	0.0398964	-0.0187301	-0.0377842	0.0149483	0.0550271	-0.0644252	K
93	0.0133185	0.0754717	0.103219	0.132075	0.153163	0.18202	0.208657	0.132075	L			93	0.00751909	0.0702034	0.0633222	0.150806	0.190947	0.167072	0.15363	0.196501	L		93	0.00579944	0.00526827	0.0398964	-0.0187301	-0.0377842	0.0149483	0.0550271	-0.0644252	L			93	0.00579944	0.00526827	0.0398964	-0.0187301	-0.0377842	0.0149483	0.0550271	-0.0644252	L
94	0.0133185	0.0754717	0.103219	0.132075	0.153163	0.18202	0.208657	0.132075	R			94	0.00751909	0.0702034	0.0633222	0.150806	0.190947	0.167072	0.15363	0.196501	R		94	0.00579944	0.00526827	0.0398964	-0.0187301	-0.0377842	0.0149483	0.0550271	-0.0644252	R			94	0.00579944	0.00526827	0.0398964	-0.0187301	-0.0377842	0.0149483	0.0550271	-0.0644252	R
95	0.0133185	0.0754717	0.103219	0.132075	0.153163	0.18202	0.208657	0.132075	P			95	0.00751909	0.0702034	0.0633222	0.150806	0.190947	0.167072	0.15363	0.196501	P		95	0.00579944	0.00526827	0.0398964	-0.0187301	-0.0377842	0.0149483	0.0550271	-0.0644252	P			95	0.00579944	0.00526827	0.0398964	-0.0187301	-0.0377842	0.0149483	0.0550271	-0.0644252	P
96	0.0133185	0.0754717	0.103219	0.132075	0.153163	0.18202	0.208657	0.132075	V			96	0.00751909	0.0702034	0.0633222	0.150806	0.190947	0.167072	0.15363	0.196501	V		96	0.00579944	0.00526827	0.0398964	-0.0187301	-0.0377842	0.0149483	0.0550271	-0.0644252	V			96	0.00579944	0.00526827	0.0398964	-0.0187301	-0.0377842	0.0149483	0.0550271	-0.0644252	V
97	0.0133185	0.0754717	0.103219	0.132075	0.153163	0.18202	0.208657	0.132075	A			97	0.00751909	0.0702034	0.0633222	0.150806	0.190947	0.167072	0.15363	0.196501	A		97	0.00579944	0.00526827	0.0398964	-0.0187301	-0.0377842	0.0149483	0.0550271	-0.0644252	A			97	0.00579944	0.00526827	0.0398964	-0.0187301	-0.0377842	0.0149483	0.0550271	-0.0644252	A
98	0.00833333	0.065	0.101667	0.141667	0.16	0.178333	0.215	0.13	A			98	0.00621727	0.0649781	0.0628477	0.152785	0.175956	0.177192	0.161277	0.198747	A		98	0.00211606	2.19393e-05	0.0388189	-0.0111187	-0.0159563	0.00114176	0.0537228	-0.0687465	A			98	0.00211606	2.19393e-05	0.0388189	-0.0111187	-0.0159563	0.00114176	0.0537228	-0.0687465	A
99	0.00833333	0.0616667	0.105	0.146667	0.163333	0.18	0.205	0.13	E			99	0.00598979	0.0604417	0.0644465	0.157344	0.173635	0.184361	0.153077	0.200705	E		99	0.00234354	0.00122497	0.0405535	-0.0106777	-0.0103016	-0.00436069	0.0519227	-0.0707047	E			99	0.00234354	0.00122497	0.0405535	-0.0106777	-0.0103016	-0.00436069	0.0519227	-0.0707047	E
100	0.008	0.066	0.098	0.16	0.158	0.176	0.214	0.12	I			100	0.00717929	0.0646179	0.0642873	0.167066	0.152531	0.184354	0.167461	0.192504	I		100	0.000820708	0.00138214	0.0337127	-0.0070655	0.00546905	-0.00835413	0.0465386	-0.0725035	I			100	0.000820708	0.00138214	0.0337127	-0.0070655	0.00546905	-0.00835413	0.0465386	-0.0725035	I
101	0.008	0.066	0.098	0.16	0.158	0.176	0.214	0.12	Y			101	0.00717929	0.0646179	0.0642873	0.167066	0.152531	0.184354	0.167461	0.192504	Y		101	0.000820708	0.00138214	0.0337127	-0.0070655	0.00546905	-0.00835413	0.0465386	-0.0725035	Y			101	0.000820708	0.00138214	0.0337127	-0.0070655	0.00546905	-0.00835413	0.0465386	-0.0725035	Y
102	0.008	0.066	0.098	0.16	0.158	0.176	0.214	0.12	G			102	0.00717929	0.0646179	0.0642873	0.167066	0.152531	0.184354	0.167461	0.192504	G		102	0.000820708	0.00138214	0.0337127	-0.0070655	0.00546905	-0.00835413	0.0465386	-0.0725035	G			102	0.000820708	0.00138214	0.0337127	-0.0070655	0.00546905	-0.00835413	0.0465386	-0.0725035	G
103	0.008	0.066	0.098	0.16	0.158	0.176	0.214	0.12	T			103	0.00717929	0.0646179	0.0642873	0.167066	0.152531	0.184354	0.167461	0.192504	T		103	0.000820708	0.00138214	0.0337127	-0.0070655	0.00546905	-0.00835413	0.0465386	-0.0725035	T			103	0.000820708	0.00138214	0.0337127	-0.0070655	0.00546905	-0.00835413	0.0465386	-0.0725035	T
104	0.008	0.066	0.098	0.16	0.158	0.176	0.214	0.12	K			104	0.00717929	0.0646179	0.0642873	0.167066	0.152531	0.184354	0.167461	0.192504	K		104	0.000820708	0.00138214	0.0337127	-0.0070655	0.00546905	-0.00835413	0.0465386	-0.0725035	K			104	0.000820708	0.00138214	0.0337127	-0.0070655	0.00546905	-0.00835413	0.0465386	-0.0725035	K
105	0.008	0.066	0.098	0.16	0.158	0.176	0.214	0.12	E			105	0.00717929	0.0646179	0.0642873	0.167066	0.152531	0.184354	0.167461	0.192504	E		105	0.000820708	0.00138214	0.0337127	-0.0070655	0.00546905	-0.00835413	0.0465386	-0.0725035	E			105	0.000820708	0.00138214	0.0337127	-0.0070655	0.00546905	-0.00835413	0.0465386	-0.0725035	E
106	0.008	0.066	0.098	0.16	0.158	0.176	0.214	0.12	S			106	0.00717929	0.0646179	0.0642873	0.167066	0.152531	0.184354	0.167461	0.192504	S		106	0.000820708	0.00138214	0.0337127	-0.0070655	0.00546905	-0.00835413	0.0465386	-0.0725035	S			106	0.000820708	0.00138214	0.0337127	-0.0070655	0.00546905	-0.00835413	0.0465386	-0.0725035	S
107	0.008	0.066	0.098	0.16	0.158	0.176	0.214	0.12	P			107	0.00717929	0.0646179	0.0642873	0.167066	0.152531	0.184354	0.167461	0.192504	P		107	0.000820708	0.00138214	0.0337127	-0.0070655	0.00546905	-0.00835413	0.0465386	-0.0725035	P			107	0.000820708	0.00138214	0.0337127	-0.0070655	0.00546905	-0.00835413	0.0465386	-0.0725035	P
108	0.008	0.066	0.098	0.16	0.158	0.176	0.214	0.12	Q			108	0.00717929	0.0646179	0.0642873	0.167066	0.152531	0.184354	0.167461	0.192504	Q		108	0.000820708	0.00138214	0.0337127	-0.0070655	0.00546905	-0.00835413	0.0465386	-0.0725035	Q			108	0.000820708	0.00138214	0.0337127	-0.0070655	0.00546905	-0.00835413	0.0465386	-0.0725035	Q
109	0.008	0.066	0.098	0.16	0.158	0.176	0.214	0.12	T			109	0.00717929	0.0646179	0.0642873	0.167066	0.152531	0.184354	0.167461	0.192504	T		109	0.000820708	0.00138214	0.0337127	-0.0070655	0.00546905	-0.00835413	0.0465386	-0.0725035	T			109	0.000820708	0.00138214	0.0337127	-0.0070655	0.00546905	-0.00835413	0.0465386	-0.0725035	T
110	0.008	0.066	0.098	0.16	0.158	0.176	0.214	0.12	H			110	0.00717929	0.0646179	0.0642873	0.167066	0.152531	0.184354	0.167461	0.192504	H		110	0.000820708	0.00138214	0.0337127	-0.0070655	0.00546905	-0.00835413	0.0465386	-0.0725035	H			110	0.000820708	0.00138214	0.0337127	-0.0070655	0.00546905	-0.00835413	0.0465386	-0.0725035	H
111	0.008	0.066	0.098	0.16	0.158	0.176	0.214	0.12	Y			111	0.00717929	0.0646179	0.0642873	0.167066	0.152531	0.184354	0.167461	0.192504	Y		111	0.000820708	0.00138214	0.0337127	-0.0070655	0.00546905	-0.00835413	0.0465386	-0.0725035	Y			111	0.000820708	0.00138214	0.0337127	-0.0070655	0.00546905	-0.00835413	0.0465386	-0.0725035	Y
112	0	0	0	0	0	0	0	0	Y			112	0	0	0	0	0	0	0	0	Y		112									Y			112									Y
113	0	0	0	0	0	0	0	0	A			113	0	0	0	0	0	0	0	0	A		113									A			113									A
114	0	0	0	0	0	0	0	0	V			114	0	0	0	0	0	0	0	0	V		114									V			114									V
115	0	0	0	0	0	0	0	0	A			115	0	0	0	0	0	0	0	0	A		115									A			115									A
116	0.0100503	0.0603015	0.110553	0.135678	0.18593	0.18593	0.175879	0.135678	V			116	0.00925256	0.0453502	0.0555188	0.167314	0.219263	0.188174	0.161662	0.153466	V		116	0.000797691	0.0149513	0.0550339	-0.0316356	-0.0333331	-0.00224458	0.0142176	-0.0177872	V			116	0.000797691	0.0149513	0.0550339	-0.0316356	-0.0333331	-0.00224458	0.0142176	-0.0177872	V
117	0.0100503	0.0603015	0.110553	0.135678	0.18593	0.18593	0.175879	0.135678	V			117	0.00925256	0.0453502	0.0555188	0.167314	0.219263	0.188174	0.161662	0.153466	V		117	0.000797691	0.0149513	0.0550339	-0.0316356	-0.0333331	-0.00224458	0.0142176	-0.0177872	V			117	0.000797691	0.0149513	0.0550339	-0.0316356	-0.0333331	-0.00224458	0.0142176	-0.0177872	V
118	0.0100503	0.0603015	0.110553	0.135678	0.18593	0.18593	0.175879	0.135678	K			118	0.00925256	0.0453502	0.0555188	0.167314	0.219263	0.188174	0.161662	0.153466	K		118	0.000797691	0.0149513	0.0550339	-0.0316356	-0.0333331	-0.00224458	0.0142176	-0.0177872	K			118	0.000797691	0.0149513	0.0550339	-0.0316356	-0.0333331	-0.00224458	0.0142176	-0.0177872	K
119	0.0100503	0.0603015	0.110553	0.135678	0.18593	0.18593	0.175879	0.135678	K			119	0.00925256	0.0453502	0.0555188	0.167314	0.219263	0.188174	0.161662	0.153466	K		119	0.000797691	0.0149513	0.0550339	-0.0316356	-0.0333331	-0.00224458	0.0142176	-0.0177872	K			119	0.000797691	0.0149513	0.0550339	-0.0316356	-0.0333331	-0.00224458	0.0142176	-0.0177872	K
120	0.0100503	0.0603015	0.110553	0.135678	0.18593	0.18593	0.175879	0.135678	G			120	0.00925256	0.0453502	0.0555188	0.167314	0.219263	0.188174	0.161662	0.153466	G		120	0.000797691	0.0149513	0.0550339	-0.0316356	-0.0333331	-0.00224458	0.0142176	-0.0177872	G			120	0.000797691	0.0149513	0.0550339	-0.0316356	-0.0333331	-0.00224458	0.0142176	-0.0177872	G
121	0.0100503	0.0603015	0.110553	0.135678	0.18593	0.18593	0.175879	0.135678	S			121	0.00925256	0.0453502	0.0555188	0.167314	0.219263	0.188174	0.161662	0.153466	S		121	0.000797691	0.0149513	0.0550339	-0.0316356	-0.0333331	-0.00224458	0.0142176	-0.0177872	S			121	0.000797691	0.0149513	0.0550339	-0.0316356	-0.0333331	-0.00224458	0.0142176	-0.0177872	S
122	0.0100503	0.0603015	0.110553	0.135678	0.18593	0.18593	0.175879	0.135678	N			122	0.00925256	0.0453502	0.0555188	0.167314	0.219263	0.188174	0.161662	0.153466	N		122	0.000797691	0.0149513	0.0550339	-0.0316356	-0.0333331	-0.00224458	0.0142176	-0.0177872	N			122	0.000797691	0.0149513	0.0550339	-0.0316356	-0.0333331	-0.00224458	0.0142176	-0.0177872	N
123	0.01	0.0466667	0.0833333	0.11	0.156667	0.2	0.226667	0.166667	F			123	0.00950165	0.0438525	0.043984	0.128442	0.176531	0.190927	0.19353	0.213231	F		123	0.000498352	0.00281417	0.0393493	-0.0184425	-0.0198648	0.0090728	0.0331365	-0.0465639	F			123	0.000498352	0.00281417	0.0393493	-0.0184425	-0.0198648	0.0090728	0.0331365	-0.0465639	F
124	0.0100503	0.0301508	0.0703518	0.125628	0.170854	0.221106	0.241206	0.130653	Q			124	0.00804583	0.037028	0.0474038	0.137094	0.18928	0.205187	0.199522	0.176439	Q		124	0.00200442	-0.00687727	0.022948	-0.0114659	-0.0184258	0.0159185	0.0416838	-0.0457858	Q			124	0.00200442	-0.00687727	0.022948	-0.0114659	-0.0184258	0.0159185	0.0416838	-0.0457858	Q
125	0.0100503	0.0301508	0.0703518	0.125628	0.170854	0.221106	0.241206	0.130653	L			125	0.00804583	0.037028	0.0474038	0.137094	0.18928	0.205187	0.199522	0.176439	L		125	0.00200442	-0.00687727	0.022948	-0.0114659	-0.0184258	0.0159185	0.0416838	-0.0457858	L			125	0.00200442	-0.00687727	0.022948	-0.0114659	-0.0184258	0.0159185	0.0416838	-0.0457858	L
126	0.012024	0.0280561	0.0460922	0.1002	0.154309	0.226453	0.258517	0.174349	D			126	0.00804583	0.037028	0.0474038	0.137094	0.18928	0.205187	0.199522	0.176439	D		126	0.00397822	-0.00897191	-0.00131162	-0.0368936	-0.0349714	0.0212659	0.0589948	-0.00209032	D			126	0.00397822	-0.00897191	-0.00131162	-0.0368936	-0.0349714	0.0212659	0.0589948	-0.00209032	D
127	0.012024	0.0280561	0.0460922	0.1002	0.154309	0.226453	0.258517	0.174349	Q			127	0.00804583	0.037028	0.0474038	0.137094	0.18928	0.205187	0.199522	0.176439	Q		127	0.00397822	-0.00897191	-0.00131162	-0.0368936	-0.0349714	0.0212659	0.0589948	-0.00209032	Q			127	0.00397822	-0.00897191	-0.00131162	-0.0368936	-0.0349714	0.0212659	0.0589948	-0.00209032	Q
128	0.012024	0.0280561	0.0460922	0.1002	0.154309	0.226453	0.258517	0.174349	L			128	0.00804583	0.037028	0.0474038	0.137094	0.18928	0.205187	0.199522	0.176439	L		128	0.00397822	-0.00897191	-0.00131162	-0.0368936	-0.0349714	0.0212659	0.0589948	-0.00209032	L			128	0.00397822	-0.00897191	-0.00131162	-0.0368936	-0.0349714	0.0212659	0.0589948	-0.00209032	L
129	0	0	0	0	0	0	0	0	Q			129	0	0	0	0	0	0	0	0	Q		129									Q			129									Q
130	0	0	0	0	0	0	0	0	G			130	0	0	0	0	0	0	0	0	G		130									G			130									G
131	0	0	0	0	0	0	0	0	R			131	0	0	0	0	0	0	0	0	R		131									R			131									R
132	0	0	0	0	0	0	0	0	K			132	0	0	0	0	0	0	0	0	K		132									K			132									K
133	0	0	0	0	0	0	0	0	S			133	0	0	0	0	0	0	0	0	S		133									S			133									S
134	0	0	0	0	0	0	0	0	C			134	0	0	0	0	0	0	0	0	C		134									C			134									C
135	0	0	0	0	0	0	0	0	H			135	0	0	0	0	0	0	0	0	H		135									H			135									H
136	0	0	0	0	0	0	0	0	T			136	0	0	0	0	0	0	0	0	T		136									T			136									T
137	0	0	0	0	0	0	0	0	G			137	0	0	0	0	0	0	0	0	G		137									G			137									G
138	0	0	0	0	0	0	0	0	L			138	0	0	0	0	0	0	0	0	L		138									L			138									L
139	0	0	0	0	0	0	0	0	G			139	0	0	0	0	0	0	0	0	G		139									G			139									G
140	0	0	0	0	0	0	0	0	R			140	0	0	0	0	0	0	0	0	R		140									R			140									R
141	0	0	0	0	0	0	0	0	S			141	0	0	0	0	0	0	0	0	S		141									S			141									S
142	0	0	0	0	0	0	0	0	A			142	0	0	0	0	0	0	0	0	A		142									A			142									A
143	0	0	0	0	0	0	0	0	G			143	0	0	0	0	0	0	0	0	G		143									G			143									G
144	0.0167224	0.0334448	0.0501672	0.090301	0.140468	0.220736	0.274247	0.173913	W			144	0.0170918	0.045998	0.0311606	0.0959999	0.147454	0.205329	0.20502	0.251947	W		144	-0.00036943	-0.0125532	0.0190066	-0.00569889	-0.00698568	0.0154071	0.0692272	-0.0780337	W			144	-0.00036943	-0.0125532	0.0190066	-0.00569889	-0.00698568	0.0154071	0.0692272	-0.0780337	W
145	0.0167224	0.0334448	0.0501672	0.090301	0.140468	0.220736	0.274247	0.173913	V			145	0.0170918	0.045998	0.0311606	0.0959999	0.147454	0.205329	0.20502	0.251947	V		145	-0.00036943	-0.0125532	0.0190066	-0.00569889	-0.00698568	0.0154071	0.0692272	-0.0780337	V			145	-0.00036943	-0.0125532	0.0190066	-0.00569889	-0.00698568	0.0154071	0.0692272	-0.0780337	V
146	0.0167224	0.0334448	0.0501672	0.090301	0.140468	0.220736	0.274247	0.173913	I			146	0.0170918	0.045998	0.0311606	0.0959999	0.147454	0.205329	0.20502	0.251947	I		146	-0.00036943	-0.0125532	0.0190066	-0.00569889	-0.00698568	0.0154071	0.0692272	-0.0780337	I			146	-0.00036943	-0.0125532	0.0190066	-0.00569889	-0.00698568	0.0154071	0.0692272	-0.0780337	I
147	0.0167224	0.0334448	0.0501672	0.090301	0.140468	0.220736	0.274247	0.173913	P			147	0.0170918	0.045998	0.0311606	0.0959999	0.147454	0.205329	0.20502	0.251947	P		147	-0.00036943	-0.0125532	0.0190066	-0.00569889	-0.00698568	0.0154071	0.0692272	-0.0780337	P			147	-0.00036943	-0.0125532	0.0190066	-0.00569889	-0.00698568	0.0154071	0.0692272	-0.0780337	P
148	0.0167224	0.0334448	0.0501672	0.090301	0.140468	0.220736	0.274247	0.173913	M			148	0.0170918	0.045998	0.0311606	0.0959999	0.147454	0.205329	0.20502	0.251947	M		148	-0.00036943	-0.0125532	0.0190066	-0.00569889	-0.00698568	0.0154071	0.0692272	-0.0780337	M			148	-0.00036943	-0.0125532	0.0190066	-0.00569889	-0.00698568	0.0154071	0.0692272	-0.0780337	M
149	0.0167224	0.0334448	0.0501672	0.090301	0.140468	0.220736	0.274247	0.173913	G			149	0.01575	0.0426135	0.0291759	0.0977949	0.151442	0.207726	0.201949	0.253549	G		149	0.000972369	-0.00916873	0.0209913	-0.00749388	-0.0109733	0.0130093	0.0722984	-0.0796355	G			149	0.000972369	-0.00916873	0.0209913	-0.00749388	-0.0109733	0.0130093	0.0722984	-0.0796355	G
150	0.0234114	0.0468227	0.0735786	0.103679	0.133779	0.207358	0.230769	0.180602	I			150	0.00969457	0.0369377	0.0280119	0.091424	0.157915	0.221093	0.225577	0.229347	I		150	0.0137168	0.00988507	0.0455667	0.0122549	-0.024136	-0.0137353	0.00519263	-0.0487448	I			150	0.0137168	0.00988507	0.0455667	0.0122549	-0.024136	-0.0137353	0.00519263	-0.0487448	I
151	0.0234114	0.0468227	0.0735786	0.103679	0.133779	0.207358	0.230769	0.180602	L			151	0.00969457	0.0369377	0.0280119	0.091424	0.157915	0.221093	0.225577	0.229347	L		151	0.0137168	0.00988507	0.0455667	0.0122549	-0.024136	-0.0137353	0.00519263	-0.0487448	L			151	0.0137168	0.00988507	0.0455667	0.0122549	-0.024136	-0.0137353	0.00519263	-0.0487448	L
152	0.0248756	0.0621891	0.11194	0.169154	0.189055	0.156716	0.146766	0.139303	R			152	0.011288	0.0861531	0.0666048	0.269895	0.245201	0.159469	0.105664	0.0557253	R		152	0.0135876	-0.023964	0.0453355	-0.100741	-0.0561459	-0.0027521	0.0411017	0.0835782	R			152	0.0135876	-0.023964	0.0453355	-0.100741	-0.0561459	-0.0027521	0.0411017	0.0835782	R
153	0.0248756	0.0621891	0.11194	0.169154	0.189055	0.156716	0.146766	0.139303	P			153	0.011288	0.0861531	0.0666048	0.269895	0.245201	0.159469	0.105664	0.0557253	P		153	0.0135876	-0.023964	0.0453355	-0.100741	-0.0561459	-0.0027521	0.0411017	0.0835782	P			153	0.0135876	-0.023964	0.0453355	-0.100741	-0.0561459	-0.0027521	0.0411017	0.0835782	P
154	0.0248756	0.0621891	0.11194	0.169154	0.189055	0.156716	0.146766	0.139303	Y			154	0.011288	0.0861531	0.0666048	0.269895	0.245201	0.159469	0.105664	0.0557253	Y		154	0.0135876	-0.023964	0.0453355	-0.100741	-0.0561459	-0.0027521	0.0411017	0.0835782	Y			154	0.0135876	-0.023964	0.0453355	-0.100741	-0.0561459	-0.0027521	0.0411017	0.0835782	Y
155	0.0248756	0.0621891	0.11194	0.169154	0.189055	0.156716	0.146766	0.139303	L			155	0.011288	0.0861531	0.0666048	0.269895	0.245201	0.159469	0.105664	0.0557253	L		155	0.0135876	-0.023964	0.0453355	-0.100741	-0.0561459	-0.0027521	0.0411017	0.0835782	L			155	0.0135876	-0.023964	0.0453355	-0.100741	-0.0561459	-0.0027521	0.0411017	0.0835782	L
156	0.0217028	0.081803	0.1202	0.153589	0.180301	0.155259	0.156928	0.130217	S			156	0.0143663	0.0741429	0.0625851	0.18962	0.206519	0.171562	0.156584	0.124621	S		156	0.00733658	0.00766011	0.0576153	-0.0360303	-0.0262183	-0.0163035	0.000344021	0.00559612	S			156	0.00733658	0.00766011	0.0576153	-0.0360303	-0.0262183	-0.0163035	0.000344021	0.00559612	S
157	0.0217028	0.081803	0.1202	0.153589	0.180301	0.155259	0.156928	0.130217	W			157	0.0143663	0.0741429	0.0625851	0.18962	0.206519	0.171562	0.156584	0.124621	W		157	0.00733658	0.00766011	0.0576153	-0.0360303	-0.0262183	-0.0163035	0.000344021	0.00559612	W			157	0.00733658	0.00766011	0.0576153	-0.0360303	-0.0262183	-0.0163035	0.000344021	0.00559612	W
158	0.0228571	0.0814286	0.118571	0.155714	0.177143	0.158571	0.162857	0.122857	T			158	0.015496	0.0749958	0.0661089	0.190289	0.193956	0.167132	0.165789	0.126233	T		158	0.00736116	0.0064328	0.0524625	-0.0345746	-0.0168133	-0.00856092	-0.00293213	-0.00337545	T			158	0.00736116	0.0064328	0.0524625	-0.0345746	-0.0168133	-0.00856092	-0.00293213	-0.00337545	T
159	0.0199778	0.0965594	0.125416	0.155383	0.165372	0.150943	0.167592	0.118757	E			159	0.0130661	0.0900403	0.0835411	0.171117	0.173067	0.168087	0.162652	0.138431	E		159	0.00691166	0.00651909	0.0418751	-0.0157338	-0.00769509	-0.0171432	0.00493995	-0.0196737	E			159	0.00691166	0.00651909	0.0418751	-0.0157338	-0.00769509	-0.0171432	0.00493995	-0.0196737	E
160	0.018981	0.100899	0.128871	0.158841	0.167832	0.150849	0.163836	0.10989	S			160	0.0118795	0.0946505	0.0898745	0.177642	0.177147	0.166966	0.15462	0.12722	S		160	0.00710156	0.0062486	0.0389967	-0.0188012	-0.009315	-0.0161173	0.00921616	-0.0173295	S			160	0.00710156	0.0062486	0.0389967	-0.0188012	-0.009315	-0.0161173	0.00921616	-0.0173295	S
161	0.018981	0.100899	0.128871	0.158841	0.167832	0.150849	0.163836	0.10989	L			161	0.0118795	0.0946505	0.0898745	0.177642	0.177147	0.166966	0.15462	0.12722	L		161	0.00710156	0.0062486	0.0389967	-0.0188012	-0.009315	-0.0161173	0.00921616	-0.0173295	L			161	0.00710156	0.0062486	0.0389967	-0.0188012	-0.009315	-0.0161173	0.00921616	-0.0173295	L
162	0.0181984	0.101911	0.126479	0.156506	0.166515	0.152866	0.166515	0.11101	E			162	0.0121664	0.096325	0.0870517	0.174131	0.175504	0.167593	0.154404	0.132826	E		162	0.00603198	0.00558586	0.0394269	-0.0176247	-0.00898852	-0.0147264	0.0121109	-0.0218161	E			162	0.00603198	0.00558586	0.0394269	-0.0176247	-0.00898852	-0.0147264	0.0121109	-0.0218161	E
163	0.0181984	0.101911	0.126479	0.156506	0.166515	0.152866	0.166515	0.11101	P			163	0.0121664	0.096325	0.0870517	0.174131	0.175504	0.167593	0.154404	0.132826	P		163	0.00603198	0.00558586	0.0394269	-0.0176247	-0.00898852	-0.0147264	0.0121109	-0.0218161	P			163	0.00603198	0.00558586	0.0394269	-0.0176247	-0.00898852	-0.0147264	0.0121109	-0.0218161	P
164	0.0181984	0.101911	0.126479	0.156506	0.166515	0.152866	0.166515	0.11101	L			164	0.0121664	0.096325	0.0870517	0.174131	0.175504	0.167593	0.154404	0.132826	L		164	0.00603198	0.00558586	0.0394269	-0.0176247	-0.00898852	-0.0147264	0.0121109	-0.0218161	L			164	0.00603198	0.00558586	0.0394269	-0.0176247	-0.00898852	-0.0147264	0.0121109	-0.0218161	L
165	0.0181984	0.101911	0.126479	0.156506	0.166515	0.152866	0.166515	0.11101	Q			165	0.0121664	0.096325	0.0870517	0.174131	0.175504	0.167593	0.154404	0.132826	Q		165	0.00603198	0.00558586	0.0394269	-0.0176247	-0.00898852	-0.0147264	0.0121109	-0.0218161	Q			165	0.00603198	0.00558586	0.0394269	-0.0176247	-0.00898852	-0.0147264	0.0121109	-0.0218161	Q
166	0.0181984	0.101911	0.126479	0.156506	0.166515	0.152866	0.166515	0.11101	G			166	0.0121664	0.096325	0.0870517	0.174131	0.175504	0.167593	0.154404	0.132826	G		166	0.00603198	0.00558586	0.0394269	-0.0176247	-0.00898852	-0.0147264	0.0121109	-0.0218161	G			166	0.00603198	0.00558586	0.0394269	-0.0176247	-0.00898852	-0.0147264	0.0121109	-0.0218161	G
167	0.01875	0.135	0.14	0.14375	0.14625	0.14	0.16	0.11625	A			167	0.0113729	0.120478	0.0988823	0.165002	0.160803	0.16013	0.148169	0.135162	A		167	0.00737707	0.0145217	0.0411177	-0.0212516	-0.0145533	-0.0201305	0.0118309	-0.018912	A			167	0.00737707	0.0145217	0.0411177	-0.0212516	-0.0145533	-0.0201305	0.0118309	-0.018912	A
168	0.0171674	0.144492	0.141631	0.151645	0.151645	0.13877	0.148784	0.105866	V			168	0.0100005	0.126995	0.0989728	0.17529	0.170267	0.157018	0.138687	0.12277	V		168	0.00716692	0.0174971	0.0426581	-0.0236447	-0.0186216	-0.0182483	0.0100968	-0.0169042	V			168	0.00716692	0.0174971	0.0426581	-0.0236447	-0.0186216	-0.0182483	0.0100968	-0.0169042	V
169	0.0133556	0.145242	0.143573	0.156928	0.158598	0.141903	0.146912	0.0934891	A			169	0.0100005	0.126995	0.0989728	0.17529	0.170267	0.157018	0.138687	0.12277	A		169	0.00335513	0.018247	0.0445998	-0.0183617	-0.0116692	-0.0151148	0.0082243	-0.0292806	A			169	0.00335513	0.018247	0.0445998	-0.0183617	-0.0116692	-0.0151148	0.0082243	-0.0292806	A
170	0.0133556	0.145242	0.143573	0.156928	0.158598	0.141903	0.146912	0.0934891	K			170	0.0100005	0.126995	0.0989728	0.17529	0.170267	0.157018	0.138687	0.12277	K		170	0.00335513	0.018247	0.0445998	-0.0183617	-0.0116692	-0.0151148	0.0082243	-0.0292806	K			170	0.00335513	0.018247	0.0445998	-0.0183617	-0.0116692	-0.0151148	0.0082243	-0.0292806	K
171	0.0133556	0.145242	0.143573	0.156928	0.158598	0.141903	0.146912	0.0934891	F			171	0.0100005	0.126995	0.0989728	0.17529	0.170267	0.157018	0.138687	0.12277	F		171	0.00335513	0.018247	0.0445998	-0.0183617	-0.0116692	-0.0151148	0.0082243	-0.0292806	F			171	0.00335513	0.018247	0.0445998	-0.0183617	-0.0116692	-0.0151148	0.0082243	-0.0292806	F
172	0	0	0	0	0	0	0	0	F			172	0	0	0	0	0	0	0	0	F		172									F			172									F
173	0	0	0	0	0	0	0	0	S			173	0	0	0	0	0	0	0	0	S		173									S			173									S
174	0	0	0	0	0	0	0	0	A			174	0	0	0	0	0	0	0	0	A		174									A			174									A
175	0	0	0	0	0	0	0	0	S			175	0	0	0	0	0	0	0	0	S		175									S			175									S
176	0	0	0	0	0	0	0	0	C			176	0	0	0	0	0	0	0	0	C		176									C			176									C
177	0	0	0	0	0	0	0	0	V			177	0	0	0	0	0	0	0	0	V		177									V			177									V
178	0	0	0	0	0	0	0	0	P			178	0	0	0	0	0	0	0	0	P		178									P			178									P
179	0	0	0	0	0	0	0	0	C			179	0	0	0	0	0	0	0	0	C		179									C			179									C
180	0	0	0	0	0	0	0	0	I			180	0	0	0	0	0	0	0	0	I		180									I			180									I
181	0	0	0	0	0	0	0	0	D			181	0	0	0	0	0	0	0	0	D		181									D			181									D
182	0	0	0	0	0	0	0	0	R			182	0	0	0	0	0	0	0	0	R		182									R			182									R
183	0	0	0	0	0	0	0	0	Q			183	0	0	0	0	0	0	0	0	Q		183									Q			183									Q
184	0	0	0	0	0	0	0	0	A			184	0	0	0	0	0	0	0	0	A		184									A			184									A
185	0	0	0	0	0	0	0	0	Y			185	0	0	0	0	0	0	0	0	Y		185									Y			185									Y
186	0	0	0	0	0	0	0	0	P			186	0	0	0	0	0	0	0	0	P		186									P			186									P
187	0	0	0	0	0	0	0	0	N			187	0	0	0	0	0	0	0	0	N		187									N			187									N
188	0	0	0	0	0	0	0	0	L			188	0	0	0	0	0	0	0	0	L		188									L			188									L
189	0	0	0	0	0	0	0	0	C			189	0	0	0	0	0	0	0	0	C		189									C			189									C
190	0	0	0	0	0	0	0	0	Q			190	0	0	0	0	0	0	0	0	Q		190									Q			190									Q
191	0	0	0	0	0	0	0	0	L			191	0	0	0	0	0	0	0	0	L		191									L			191									L
192	0	0	0	0	0	0	0	0	C			192	0	0	0	0	0	0	0	0	C		192									C			192									C
193	0	0	0	0	0	0	0	0	K			193	0	0	0	0	0	0	0	0	K		193									K			193									K
194	0	0	0	0	0	0	0	0	G			194	0	0	0	0	0	0	0	0	G		194									G			194									G
195	0	0	0	0	0	0	0	0	E			195	0	0	0	0	0	0	0	0	E		195									E			195									E
196	0	0	0	0	0	0	0	0	G			196	0	0	0	0	0	0	0	0	G		196									G			196									G
197	0	0	0	0	0	0	0	0	E			197	0	0	0	0	0	0	0	0	E		197									E			197									E
198	0	0	0	0	0	0	0	0	N			198	0	0	0	0	0	0	0	0	N		198									N			198									N
199	0	0	0	0	0	0	0	0	Q			199	0	0	0	0	0	0	0	0	Q		199									Q			199									Q
200	0	0	0	0	0	0	0	0	C			200	0	0	0	0	0	0	0	0	C		200									C			200									C
201	0	0	0	0	0	0	0	0	A			201	0	0	0	0	0	0	0	0	A		201									A			201									A
202	0	0	0	0	0	0	0	0	C			202	0	0	0	0	0	0	0	0	C		202									C			202									C
203	0	0	0	0	0	0	0	0	S			203	0	0	0	0	0	0	0	0	S		203									S			203									S
204	0	0	0	0	0	0	0	0	S			204	0	0	0	0	0	0	0	0	S		204									S			204									S
205	0	0	0	0	0	0	0	0	R			205	0	0	0	0	0	0	0	0	R		205									R			205									R
206	0	0	0	0	0	0	0	0	E			206	0	0	0	0	0	0	0	0	E		206									E			206									E
207	0	0	0	0	0	0	0	0	P			207	0	0	0	0	0	0	0	0	P		207									P			207									P
208	0	0	0	0	0	0	0	0	Y			208	0	0	0	0	0	0	0	0	Y		208									Y			208									Y
209	0	0	0	0	0	0	0	0	F			209	0	0	0	0	0	0	0	0	F		209									F			209									F
210	0	0	0	0	0	0	0	0	G			210	0	0	0	0	0	0	0	0	G		210									G			210									G
211	0	0	0	0	0	0	0	0	Y			211	0	0	0	0	0	0	0	0	Y		211									Y			211									Y
212	0	0	0	0	0	0	0	0	S			212	0	0	0	0	0	0	0	0	S		212									S			212									S
213	0	0	0	0	0	0	0	0	G			213	0	0	0	0	0	0	0	0	G		213									G			213									G
214	0	0	0	0	0	0	0	0	A			214	0	0	0	0	0	0	0	0	A		214									A			214									A
215	0.019802	0.128713	0.207921	0.168317	0.168317	0.128713	0.108911	0.0693069	F			215	0.00460917	0.116924	0.109413	0.229511	0.253011	0.144346	0.0732799	0.0689054	F		215	0.0151928	0.0117885	0.0985078	-0.0611944	-0.0846945	-0.0156327	0.035631	0.000401506	F			215	0.0151928	0.0117885	0.0985078	-0.0611944	-0.0846945	-0.0156327	0.035631	0.000401506	F
216	0.019802	0.128713	0.207921	0.168317	0.168317	0.128713	0.108911	0.0693069	K			216	0.00460917	0.116924	0.109413	0.229511	0.253011	0.144346	0.0732799	0.0689054	K		216	0.0151928	0.0117885	0.0985078	-0.0611944	-0.0846945	-0.0156327	0.035631	0.000401506	K			216	0.0151928	0.0117885	0.0985078	-0.0611944	-0.0846945	-0.0156327	0.035631	0.000401506	K
217	0.019802	0.128713	0.207921	0.168317	0.168317	0.128713	0.108911	0.0693069	C			217	0.00460917	0.116924	0.109413	0.229511	0.253011	0.144346	0.0732799	0.0689054	C		217	0.0151928	0.0117885	0.0985078	-0.0611944	-0.0846945	-0.0156327	0.035631	0.000401506	C			217	0.0151928	0.0117885	0.0985078	-0.0611944	-0.0846945	-0.0156327	0.035631	0.000401506	C
218	0.019802	0.128713	0.207921	0.168317	0.168317	0.128713	0.108911	0.0693069	L			218	0.00460917	0.116924	0.109413	0.229511	0.253011	0.144346	0.0732799	0.0689054	L		218	0.0151928	0.0117885	0.0985078	-0.0611944	-0.0846945	-0.0156327	0.035631	0.000401506	L			218	0.0151928	0.0117885	0.0985078	-0.0611944	-0.0846945	-0.0156327	0.035631	0.000401506	L
219	0.019802	0.128713	0.207921	0.168317	0.168317	0.128713	0.108911	0.0693069	Q			219	0.00460917	0.116924	0.109413	0.229511	0.253011	0.144346	0.0732799	0.0689054	Q		219	0.0151928	0.0117885	0.0985078	-0.0611944	-0.0846945	-0.0156327	0.035631	0.000401506	Q			219	0.0151928	0.0117885	0.0985078	-0.0611944	-0.0846945	-0.0156327	0.035631	0.000401506	Q
220	0.019802	0.128713	0.207921	0.168317	0.168317	0.128713	0.108911	0.0693069	D			220	0.00460917	0.116924	0.109413	0.229511	0.253011	0.144346	0.0732799	0.0689054	D		220	0.0151928	0.0117885	0.0985078	-0.0611944	-0.0846945	-0.0156327	0.035631	0.000401506	D			220	0.0151928	0.0117885	0.0985078	-0.0611944	-0.0846945	-0.0156327	0.035631	0.000401506	D
221	0.019802	0.128713	0.207921	0.168317	0.168317	0.128713	0.108911	0.0693069	G			221	0.00460917	0.116924	0.109413	0.229511	0.253011	0.144346	0.0732799	0.0689054	G		221	0.0151928	0.0117885	0.0985078	-0.0611944	-0.0846945	-0.0156327	0.035631	0.000401506	G			221	0.0151928	0.0117885	0.0985078	-0.0611944	-0.0846945	-0.0156327	0.035631	0.000401506	G
222	0.019802	0.128713	0.207921	0.168317	0.168317	0.128713	0.108911	0.0693069	A			222	0.00460917	0.116924	0.109413	0.229511	0.253011	0.144346	0.0732799	0.0689054	A		222	0.0151928	0.0117885	0.0985078	-0.0611944	-0.0846945	-0.0156327	0.035631	0.000401506	A			222	0.0151928	0.0117885	0.0985078	-0.0611944	-0.0846945	-0.0156327	0.035631	0.000401506	A
223	0.019802	0.128713	0.207921	0.168317	0.168317	0.128713	0.108911	0.0693069	G			223	0.00460917	0.116924	0.109413	0.229511	0.253011	0.144346	0.0732799	0.0689054	G		223	0.0151928	0.0117885	0.0985078	-0.0611944	-0.0846945	-0.0156327	0.035631	0.000401506	G			223	0.0151928	0.0117885	0.0985078	-0.0611944	-0.0846945	-0.0156327	0.035631	0.000401506	G
224	0.019802	0.128713	0.207921	0.168317	0.168317	0.128713	0.108911	0.0693069	D			224	0.00460917	0.116924	0.109413	0.229511	0.253011	0.144346	0.0732799	0.0689054	D		224	0.0151928	0.0117885	0.0985078	-0.0611944	-0.0846945	-0.0156327	0.035631	0.000401506	D			224	0.0151928	0.0117885	0.0985078	-0.0611944	-0.0846945	-0.0156327	0.035631	0.000401506	D
225	0.019802	0.128713	0.207921	0.168317	0.168317	0.128713	0.108911	0.0693069	V			225	0.00460917	0.116924	0.109413	0.229511	0.253011	0.144346	0.0732799	0.0689054	V		225	0.0151928	0.0117885	0.0985078	-0.0611944	-0.0846945	-0.0156327	0.035631	0.000401506	V			225	0.0151928	0.0117885	0.0985078	-0.0611944	-0.0846945	-0.0156327	0.035631	0.000401506	V
226	0.019802	0.128713	0.207921	0.168317	0.168317	0.128713	0.108911	0.0693069	A			226	0.00460917	0.116924	0.109413	0.229511	0.253011	0.144346	0.0732799	0.0689054	A		226	0.0151928	0.0117885	0.0985078	-0.0611944	-0.0846945	-0.0156327	0.035631	0.000401506	A			226	0.0151928	0.0117885	0.0985078	-0.0611944	-0.0846945	-0.0156327	0.035631	0.000401506	A
227	0.0100503	0.110553	0.165829	0.160804	0.160804	0.150754	0.150754	0.0904523	F			227	0.00649651	0.104752	0.0966177	0.195222	0.204513	0.157727	0.11857	0.116103	F		227	0.00355374	0.00580123	0.0692114	-0.0344175	-0.0437087	-0.00697294	0.0321833	-0.0256505	F			227	0.00355374	0.00580123	0.0692114	-0.0344175	-0.0437087	-0.00697294	0.0321833	-0.0256505	F
228	0.02	0.095	0.125	0.155	0.145	0.16	0.16	0.14	V			228	0.00892108	0.0908886	0.0703035	0.156624	0.170348	0.168568	0.151321	0.183026	V		228	0.0110789	0.00411136	0.0546965	-0.0016243	-0.0253475	-0.00856842	0.00867913	-0.0430257	V			228	0.0110789	0.00411136	0.0546965	-0.0016243	-0.0253475	-0.00856842	0.00867913	-0.0430257	V
229	0.02	0.095	0.125	0.155	0.145	0.16	0.16	0.14	K			229	0.00892108	0.0908886	0.0703035	0.156624	0.170348	0.168568	0.151321	0.183026	K		229	0.0110789	0.00411136	0.0546965	-0.0016243	-0.0253475	-0.00856842	0.00867913	-0.0430257	K			229	0.0110789	0.00411136	0.0546965	-0.0016243	-0.0253475	-0.00856842	0.00867913	-0.0430257	K
230	0.02	0.095	0.125	0.155	0.145	0.16	0.16	0.14	E			230	0.00892108	0.0908886	0.0703035	0.156624	0.170348	0.168568	0.151321	0.183026	E		230	0.0110789	0.00411136	0.0546965	-0.0016243	-0.0253475	-0.00856842	0.00867913	-0.0430257	E			230	0.0110789	0.00411136	0.0546965	-0.0016243	-0.0253475	-0.00856842	0.00867913	-0.0430257	E
231	0.02	0.095	0.125	0.155	0.145	0.16	0.16	0.14	T			231	0.00892108	0.0908886	0.0703035	0.156624	0.170348	0.168568	0.151321	0.183026	T		231	0.0110789	0.00411136	0.0546965	-0.0016243	-0.0253475	-0.00856842	0.00867913	-0.0430257	T			231	0.0110789	0.00411136	0.0546965	-0.0016243	-0.0253475	-0.00856842	0.00867913	-0.0430257	T
232	0.02	0.095	0.125	0.155	0.145	0.16	0.16	0.14	T			232	0.00892108	0.0908886	0.0703035	0.156624	0.170348	0.168568	0.151321	0.183026	T		232	0.0110789	0.00411136	0.0546965	-0.0016243	-0.0253475	-0.00856842	0.00867913	-0.0430257	T			232	0.0110789	0.00411136	0.0546965	-0.0016243	-0.0253475	-0.00856842	0.00867913	-0.0430257	T
233	0.02	0.095	0.125	0.155	0.145	0.16	0.16	0.14	V			233	0.00892108	0.0908886	0.0703035	0.156624	0.170348	0.168568	0.151321	0.183026	V		233	0.0110789	0.00411136	0.0546965	-0.0016243	-0.0253475	-0.00856842	0.00867913	-0.0430257	V			233	0.0110789	0.00411136	0.0546965	-0.0016243	-0.0253475	-0.00856842	0.00867913	-0.0430257	V
234	0.0133333	0.07	0.0966667	0.143333	0.14	0.19	0.206667	0.14	F			234	0.00693835	0.0669478	0.059065	0.143746	0.159921	0.194769	0.201125	0.167488	F		234	0.00639498	0.00305219	0.0376016	-0.000412917	-0.0199207	-0.00476885	0.00554151	-0.0274879	F			234	0.00639498	0.00305219	0.0376016	-0.000412917	-0.0199207	-0.00476885	0.00554151	-0.0274879	F
235	0.0133333	0.0383333	0.05	0.111667	0.165	0.206667	0.25	0.165	E			235	0.00615154	0.0343384	0.0309985	0.11434	0.175598	0.203113	0.199238	0.236223	E		235	0.00718179	0.00399492	0.0190015	-0.00267328	-0.010598	0.00355408	0.0507618	-0.0712228	E			235	0.00718179	0.00399492	0.0190015	-0.00267328	-0.010598	0.00355408	0.0507618	-0.0712228	E
236	0.0133333	0.0383333	0.05	0.111667	0.165	0.206667	0.25	0.165	N			236	0.00615154	0.0343384	0.0309985	0.11434	0.175598	0.203113	0.199238	0.236223	N		236	0.00718179	0.00399492	0.0190015	-0.00267328	-0.010598	0.00355408	0.0507618	-0.0712228	N			236	0.00718179	0.00399492	0.0190015	-0.00267328	-0.010598	0.00355408	0.0507618	-0.0712228	N
237	0.0133333	0.0383333	0.05	0.111667	0.165	0.206667	0.25	0.165	L			237	0.00615154	0.0343384	0.0309985	0.11434	0.175598	0.203113	0.199238	0.236223	L		237	0.00718179	0.00399492	0.0190015	-0.00267328	-0.010598	0.00355408	0.0507618	-0.0712228	L			237	0.00718179	0.00399492	0.0190015	-0.00267328	-0.010598	0.00355408	0.0507618	-0.0712228	L
238	0.0133333	0.0383333	0.05	0.111667	0.165	0.206667	0.25	0.165	P			238	0.00615154	0.0343384	0.0309985	0.11434	0.175598	0.203113	0.199238	0.236223	P		238	0.00718179	0.00399492	0.0190015	-0.00267328	-0.010598	0.00355408	0.0507618	-0.0712228	P			238	0.00718179	0.00399492	0.0190015	-0.00267328	-0.010598	0.00355408	0.0507618	-0.0712228	P
239	0.0133333	0.0383333	0.05	0.111667	0.165	0.206667	0.25	0.165	E			239	0.00615154	0.0343384	0.0309985	0.11434	0.175598	0.203113	0.199238	0.236223	E		239	0.00718179	0.00399492	0.0190015	-0.00267328	-0.010598	0.00355408	0.0507618	-0.0712228	E			239	0.00718179	0.00399492	0.0190015	-0.00267328	-0.010598	0.00355408	0.0507618	-0.0712228	E
240	0.0133333	0.0383333	0.05	0.111667	0.165	0.206667	0.25	0.165	K			240	0.00615154	0.0343384	0.0309985	0.11434	0.175598	0.203113	0.199238	0.236223	K		240	0.00718179	0.00399492	0.0190015	-0.00267328	-0.010598	0.00355408	0.0507618	-0.0712228	K			240	0.00718179	0.00399492	0.0190015	-0.00267328	-0.010598	0.00355408	0.0507618	-0.0712228	K
241	0.0133333	0.0383333	0.05	0.111667	0.165	0.206667	0.25	0.165	A			241	0.00615154	0.0343384	0.0309985	0.11434	0.175598	0.203113	0.199238	0.236223	A		241	0.00718179	0.00399492	0.0190015	-0.00267328	-0.010598	0.00355408	0.0507618	-0.0712228	A			241	0.00718179	0.00399492	0.0190015	-0.00267328	-0.010598	0.00355408	0.0507618	-0.0712228	A
242	0.0133333	0.0383333	0.05	0.111667	0.165	0.206667	0.25	0.165	D			242	0.00615154	0.0343384	0.0309985	0.11434	0.175598	0.203113	0.199238	0.236223	D		242	0.00718179	0.00399492	0.0190015	-0.00267328	-0.010598	0.00355408	0.0507618	-0.0712228	D			242	0.00718179	0.00399492	0.0190015	-0.00267328	-0.010598	0.00355408	0.0507618	-0.0712228	D
243	0.0133333	0.0383333	0.05	0.111667	0.165	0.206667	0.25	0.165	R			243	0.00615154	0.0343384	0.0309985	0.11434	0.175598	0.203113	0.199238	0.236223	R		243	0.00718179	0.00399492	0.0190015	-0.00267328	-0.010598	0.00355408	0.0507618	-0.0712228	R			243	0.00718179	0.00399492	0.0190015	-0.00267328	-0.010598	0.00355408	0.0507618	-0.0712228	R
244	0.0133333	0.0383333	0.05	0.111667	0.165	0.206667	0.25	0.165	D			244	0.00615154	0.0343384	0.0309985	0.11434	0.175598	0.203113	0.199238	0.236223	D		244	0.00718179	0.00399492	0.0190015	-0.00267328	-0.010598	0.00355408	0.0507618	-0.0712228	D			244	0.00718179	0.00399492	0.0190015	-0.00267328	-0.010598	0.00355408	0.0507618	-0.0712228	D
245	0.0133333	0.0383333	0.05	0.111667	0.165	0.206667	0.25	0.165	Q			245	0.00615154	0.0343384	0.0309985	0.11434	0.175598	0.203113	0.199238	0.236223	Q		245	0.00718179	0.00399492	0.0190015	-0.00267328	-0.010598	0.00355408	0.0507618	-0.0712228	Q			245	0.00718179	0.00399492	0.0190015	-0.00267328	-0.010598	0.00355408	0.0507618	-0.0712228	Q
246	0.00801603	0.0340681	0.0480962	0.112224	0.174349	0.220441	0.254509	0.148297	Y			246	0.0059376	0.0273118	0.0323005	0.123983	0.181565	0.206248	0.208158	0.214496	Y		246	0.00207843	0.0067563	0.0157957	-0.0117588	-0.00721637	0.0141929	0.0463515	-0.0661996	Y			246	0.00207843	0.0067563	0.0157957	-0.0117588	-0.00721637	0.0141929	0.0463515	-0.0661996	Y
247	0.0075188	0.0350877	0.0451128	0.117794	0.170426	0.225564	0.260652	0.137845	E			247	0.00531766	0.0259114	0.0303237	0.123261	0.183111	0.210249	0.211881	0.209945	E		247	0.00220114	0.00917637	0.0147891	-0.00546615	-0.0126852	0.0153153	0.0487703	-0.0721009	E			247	0.00220114	0.00917637	0.0147891	-0.00546615	-0.0126852	0.0153153	0.0487703	-0.0721009	E
248	0.00664452	0.0431894	0.0465116	0.116279	0.166113	0.229236	0.262458	0.129568	L			248	0.0049746	0.0274607	0.030435	0.12023	0.183397	0.208342	0.215224	0.209937	L		248	0.00166992	0.0157287	0.0160766	-0.00395105	-0.017284	0.0208934	0.0472348	-0.0803685	L			248	0.00166992	0.0157287	0.0160766	-0.00395105	-0.017284	0.0208934	0.0472348	-0.0803685	L
249	0	0	0	0	0	0	0	0	L			249	0	0	0	0	0	0	0	0	L		249									L			249									L
250	0	0	0	0	0	0	0	0	C			250	0	0	0	0	0	0	0	0	C		250									C			250									C
251	0	0	0	0	0	0	0	0	L			251	0	0	0	0	0	0	0	0	L		251									L			251									L
252	0	0	0	0	0	0	0	0	N			252	0	0	0	0	0	0	0	0	N		252									N			252									N
253	0	0	0	0	0	0	0	0	N			253	0	0	0	0	0	0	0	0	N		253									N			253									N
254	0	0	0	0	0	0	0	0	S			254	0	0	0	0	0	0	0	0	S		254									S			254									S
255	0	0	0	0	0	0	0	0	R			255	0	0	0	0	0	0	0	0	R		255									R			255									R
256	0	0	0	0	0	0	0	0	A			256	0	0	0	0	0	0	0	0	A		256									A			256									A
257	0	0	0	0	0	0	0	0	P			257	0	0	0	0	0	0	0	0	P		257									P			257									P
258	0	0	0	0	0	0	0	0	V			258	0	0	0	0	0	0	0	0	V		258									V			258									V
259	0	0	0	0	0	0	0	0	D			259	0	0	0	0	0	0	0	0	D		259									D			259									D
260	0	0	0	0	0	0	0	0	A			260	0	0	0	0	0	0	0	0	A		260									A			260									A
261	0	0	0	0	0	0	0	0	F			261	0	0	0	0	0	0	0	0	F		261									F			261									F
262	0	0	0	0	0	0	0	0	K			262	0	0	0	0	0	0	0	0	K		262									K			262									K
263	0	0	0	0	0	0	0	0	E			263	0	0	0	0	0	0	0	0	E		263									E			263									E
264	0	0	0	0	0	0	0	0	C			264	0	0	0	0	0	0	0	0	C		264									C			264									C
265	0	0	0	0	0	0	0	0	H			265	0	0	0	0	0	0	0	0	H		265									H			265									H
266	0	0	0	0	0	0	0	0	L			266	0	0	0	0	0	0	0	0	L		266									L			266									L
267	0	0	0	0	0	0	0	0	A			267	0	0	0	0	0	0	0	0	A		267									A			267									A
268	0	0	0	0	0	0	0	0	Q			268	0	0	0	0	0	0	0	0	Q		268									Q			268									Q
269	0	0	0	0	0	0	0	0	V			269	0	0	0	0	0	0	0	0	V		269									V			269									V
270	0	0	0	0	0	0	0	0	P			270	0	0	0	0	0	0	0	0	P		270									P			270									P
271	0	0	0	0	0	0	0	0	S			271	0	0	0	0	0	0	0	0	S		271									S			271									S
272	0	0	0	0	0	0	0	0	H			272	0	0	0	0	0	0	0	0	H		272									H			272									H
273	0.02	0.03	0.06	0.09	0.18	0.21	0.22	0.19	A			273	0.0104286	0.0777485	0.00609871	0.0555804	0.184325	0.212205	0.117468	0.336146	A		273	0.00957136	-0.0477485	0.0539013	0.0344196	-0.00432542	-0.00220463	0.102532	-0.146146	A			273	0.00957136	-0.0477485	0.0539013	0.0344196	-0.00432542	-0.00220463	0.102532	-0.146146	A
274	0.015	0.04	0.055	0.09	0.155	0.215	0.25	0.18	V			274	0.0102006	0.0645578	0.0224225	0.0704837	0.159981	0.221346	0.172549	0.278459	V		274	0.00479944	-0.0245578	0.0325775	0.0195163	-0.0049813	-0.00634623	0.0774514	-0.0984594	V			274	0.00479944	-0.0245578	0.0325775	0.0195163	-0.0049813	-0.00634623	0.0774514	-0.0984594	V
275	0.015	0.04	0.055	0.09	0.155	0.215	0.25	0.18	V			275	0.0102006	0.0645578	0.0224225	0.0704837	0.159981	0.221346	0.172549	0.278459	V		275	0.00479944	-0.0245578	0.0325775	0.0195163	-0.0049813	-0.00634623	0.0774514	-0.0984594	V			275	0.00479944	-0.0245578	0.0325775	0.0195163	-0.0049813	-0.00634623	0.0774514	-0.0984594	V
276	0.0165563	0.0331126	0.0463576	0.0794702	0.142384	0.211921	0.248344	0.221854	A			276	0.0108418	0.0538381	0.0213954	0.0673401	0.145329	0.218528	0.191477	0.29125	A		276	0.00571449	-0.0207255	0.0249623	0.0121301	-0.00294509	-0.00660779	0.0568671	-0.0693955	A			276	0.00571449	-0.0207255	0.0249623	0.0121301	-0.00294509	-0.00660779	0.0568671	-0.0693955	A
277	0.016	0.028	0.048	0.124	0.174	0.2	0.206	0.204	R			277	0.0110036	0.0412602	0.0238487	0.092042	0.173839	0.215451	0.183637	0.258918	R		277	0.00499645	-0.0132602	0.0241513	0.031958	0.000161029	-0.0154513	0.0223633	-0.0549185	R			277	0.00499645	-0.0132602	0.0241513	0.031958	0.000161029	-0.0154513	0.0223633	-0.0549185	R
278	0.016	0.028	0.048	0.124	0.174	0.2	0.206	0.204	S			278	0.0110036	0.0412602	0.0238487	0.092042	0.173839	0.215451	0.183637	0.258918	S		278	0.00499645	-0.0132602	0.0241513	0.031958	0.000161029	-0.0154513	0.0223633	-0.0549185	S			278	0.00499645	-0.0132602	0.0241513	0.031958	0.000161029	-0.0154513	0.0223633	-0.0549185	S
279	0.016	0.028	0.048	0.124	0.174	0.2	0.206	0.204	V			279	0.0110036	0.0412602	0.0238487	0.092042	0.173839	0.215451	0.183637	0.258918	V		279	0.00499645	-0.0132602	0.0241513	0.031958	0.000161029	-0.0154513	0.0223633	-0.0549185	V			279	0.00499645	-0.0132602	0.0241513	0.031958	0.000161029	-0.0154513	0.0223633	-0.0549185	V
280	0.016	0.028	0.048	0.124	0.174	0.2	0.206	0.204	D			280	0.0110036	0.0412602	0.0238487	0.092042	0.173839	0.215451	0.183637	0.258918	D		280	0.00499645	-0.0132602	0.0241513	0.031958	0.000161029	-0.0154513	0.0223633	-0.0549185	D			280	0.00499645	-0.0132602	0.0241513	0.031958	0.000161029	-0.0154513	0.0223633	-0.0549185	D
281	0.016	0.028	0.048	0.124	0.174	0.2	0.206	0.204	G			281	0.0110036	0.0412602	0.0238487	0.092042	0.173839	0.215451	0.183637	0.258918	G		281	0.00499645	-0.0132602	0.0241513	0.031958	0.000161029	-0.0154513	0.0223633	-0.0549185	G			281	0.00499645	-0.0132602	0.0241513	0.031958	0.000161029	-0.0154513	0.0223633	-0.0549185	G
282	0.016	0.028	0.048	0.124	0.174	0.2	0.206	0.204	K			282	0.0110036	0.0412602	0.0238487	0.092042	0.173839	0.215451	0.183637	0.258918	K		282	0.00499645	-0.0132602	0.0241513	0.031958	0.000161029	-0.0154513	0.0223633	-0.0549185	K			282	0.00499645	-0.0132602	0.0241513	0.031958	0.000161029	-0.0154513	0.0223633	-0.0549185	K
283	0.016	0.028	0.048	0.124	0.174	0.2	0.206	0.204	E			283	0.0110036	0.0412602	0.0238487	0.092042	0.173839	0.215451	0.183637	0.258918	E		283	0.00499645	-0.0132602	0.0241513	0.031958	0.000161029	-0.0154513	0.0223633	-0.0549185	E			283	0.00499645	-0.0132602	0.0241513	0.031958	0.000161029	-0.0154513	0.0223633	-0.0549185	E
284	0.015	0.0283333	0.0433333	0.118333	0.17	0.203333	0.218333	0.203333	D			284	0.0113946	0.041606	0.0228638	0.0904962	0.167581	0.21651	0.190856	0.258692	D		284	0.00360536	-0.0132726	0.0204695	0.0278371	0.00241853	-0.0131764	0.0274776	-0.0553591	D			284	0.00360536	-0.0132726	0.0204695	0.0278371	0.00241853	-0.0131764	0.0274776	-0.0553591	D
285	0.015	0.0283333	0.0433333	0.118333	0.17	0.203333	0.218333	0.203333	L			285	0.0113946	0.041606	0.0228638	0.0904962	0.167581	0.21651	0.190856	0.258692	L		285	0.00360536	-0.0132726	0.0204695	0.0278371	0.00241853	-0.0131764	0.0274776	-0.0553591	L			285	0.00360536	-0.0132726	0.0204695	0.0278371	0.00241853	-0.0131764	0.0274776	-0.0553591	L
286	0.0150754	0.0251256	0.0502513	0.20603	0.241206	0.180905	0.160804	0.120603	I			286	0.0104801	0.0268112	0.0280171	0.142486	0.226506	0.210106	0.161032	0.194561	I		286	0.00459526	-0.00168561	0.0222342	0.063544	0.0147002	-0.0292018	-0.000228217	-0.073958	I			286	0.00459526	-0.00168561	0.0222342	0.063544	0.0147002	-0.0292018	-0.000228217	-0.073958	I
287	0.0150754	0.0251256	0.0502513	0.20603	0.241206	0.180905	0.160804	0.120603	W			287	0.0104801	0.0268112	0.0280171	0.142486	0.226506	0.210106	0.161032	0.194561	W		287	0.00459526	-0.00168561	0.0222342	0.063544	0.0147002	-0.0292018	-0.000228217	-0.073958	W			287	0.00459526	-0.00168561	0.0222342	0.063544	0.0147002	-0.0292018	-0.000228217	-0.073958	W
288	0.0150754	0.0251256	0.0502513	0.20603	0.241206	0.180905	0.160804	0.120603	K			288	0.0104801	0.0268112	0.0280171	0.142486	0.226506	0.210106	0.161032	0.194561	K		288	0.00459526	-0.00168561	0.0222342	0.063544	0.0147002	-0.0292018	-0.000228217	-0.073958	K			288	0.00459526	-0.00168561	0.0222342	0.063544	0.0147002	-0.0292018	-0.000228217	-0.073958	K
289	0.0150754	0.0251256	0.0502513	0.20603	0.241206	0.180905	0.160804	0.120603	L			289	0.0104801	0.0268112	0.0280171	0.142486	0.226506	0.210106	0.161032	0.194561	L		289	0.00459526	-0.00168561	0.0222342	0.063544	0.0147002	-0.0292018	-0.000228217	-0.073958	L			289	0.00459526	-0.00168561	0.0222342	0.063544	0.0147002	-0.0292018	-0.000228217	-0.073958	L
290	0	0	0	0	0	0	0	0	L			290	0	0	0	0	0	0	0	0	L		290									L			290									L
291	0	0	0	0	0	0	0	0	S			291	0	0	0	0	0	0	0	0	S		291									S			291									S
292	0	0	0	0	0	0	0	0	K			292	0	0	0	0	0	0	0	0	K		292									K			292									K
293	0	0	0	0	0	0	0	0	A			293	0	0	0	0	0	0	0	0	A		293									A			293									A
294	0	0	0	0	0	0	0	0	Q			294	0	0	0	0	0	0	0	0	Q		294									Q			294									Q
295	0	0	0	0	0	0	0	0	E			295	0	0	0	0	0	0	0	0	E		295									E			295									E
296	0	0	0	0	0	0	0	0	K			296	0	0	0	0	0	0	0	0	K		296									K			296									K
297	0	0	0	0	0	0	0	0	F			297	0	0	0	0	0	0	0	0	F		297									F			297									F
298	0	0	0	0	0	0	0	0	G			298	0	0	0	0	0	0	0	0	G		298									G			298									G
299	0	0	0	0	0	0	0	0	K			299	0	0	0	0	0	0	0	0	K		299									K			299									K
300	0	0	0	0	0	0	0	0	N			300	0	0	0	0	0	0	0	0	N		300									N			300									N
301	0	0	0	0	0	0	0	0	K			301	0	0	0	0	0	0	0	0	K		301									K			301									K
302	0	0	0	0	0	0	0	0	S			302	0	0	0	0	0	0	0	0	S		302									S			302									S
303	0	0	0	0	0	0	0	0	R			303	0	0	0	0	0	0	0	0	R		303									R			303									R
304	0.029703	0.138614	0.0891089	0.148515	0.178218	0.207921	0.0891089	0.118812	S			304	0.0291094	0.121622	0.101434	0.175028	0.182705	0.171786	0.099169	0.119146	S		304	0.000593551	0.0169918	-0.0123251	-0.0265131	-0.00448695	0.0361344	-0.0100601	-0.000334593	S			304	0.000593551	0.0169918	-0.0123251	-0.0265131	-0.00448695	0.0361344	-0.0100601	-0.000334593	S
305	0.025	0.085	0.075	0.135	0.175	0.215	0.17	0.12	F			305	0.0230394	0.0861848	0.0767636	0.149664	0.176195	0.187113	0.15815	0.14289	F		305	0.00196062	-0.00118482	-0.00176358	-0.0146644	-0.00119486	0.0278873	0.0118501	-0.0228904	F			305	0.00196062	-0.00118482	-0.00176358	-0.0146644	-0.00119486	0.0278873	0.0118501	-0.0228904	F
306	0.0233333	0.08	0.0766667	0.13	0.173333	0.21	0.176667	0.13	Q			306	0.0234447	0.0810344	0.0682663	0.148674	0.178308	0.187606	0.165004	0.147662	Q		306	-0.000111402	-0.00103441	0.00840041	-0.0186742	-0.00497512	0.0223941	0.0116626	-0.017662	Q			306	-0.000111402	-0.00103441	0.00840041	-0.0186742	-0.00497512	0.0223941	0.0116626	-0.017662	Q
307	0.0325	0.08	0.09	0.13	0.17	0.1925	0.185	0.12	L			307	0.029738	0.082786	0.0715006	0.143295	0.175331	0.176371	0.16915	0.151829	L		307	0.00276198	-0.00278604	0.0184994	-0.0132946	-0.00533068	0.0161288	0.01585	-0.0318289	L			307	0.00276198	-0.00278604	0.0184994	-0.0132946	-0.00533068	0.0161288	0.01585	-0.0318289	L
308	0.0300501	0.0717863	0.0884808	0.143573	0.170284	0.188648	0.183639	0.123539	F			308	0.0270475	0.0748597	0.0761394	0.153799	0.174853	0.171469	0.168913	0.152918	F		308	0.00300262	-0.00307339	0.0123414	-0.0102265	-0.00456954	0.0171783	0.014726	-0.0293789	F			308	0.00300262	-0.00307339	0.0123414	-0.0102265	-0.00456954	0.0171783	0.014726	-0.0293789	F
309	0.0300501	0.0717863	0.0884808	0.143573	0.170284	0.188648	0.183639	0.123539	G			309	0.0270475	0.0748597	0.0761394	0.153799	0.174853	0.171469	0.168913	0.152918	G		309	0.00300262	-0.00307339	0.0123414	-0.0102265	-0.00456954	0.0171783	0.014726	-0.0293789	G			309	0.00300262	-0.00307339	0.0123414	-0.0102265	-0.00456954	0.0171783	0.014726	-0.0293789	G
310	0.0300501	0.0717863	0.0884808	0.143573	0.170284	0.188648	0.183639	0.123539	S			310	0.0270475	0.0748597	0.0761394	0.153799	0.174853	0.171469	0.168913	0.152918	S		310	0.00300262	-0.00307339	0.0123414	-0.0102265	-0.00456954	0.0171783	0.014726	-0.0293789	S			310	0.00300262	-0.00307339	0.0123414	-0.0102265	-0.00456954	0.0171783	0.014726	-0.0293789	S
311	0.0300501	0.0717863	0.0884808	0.143573	0.170284	0.188648	0.183639	0.123539	P			311	0.0270475	0.0748597	0.0761394	0.153799	0.174853	0.171469	0.168913	0.152918	P		311	0.00300262	-0.00307339	0.0123414	-0.0102265	-0.00456954	0.0171783	0.014726	-0.0293789	P			311	0.00300262	-0.00307339	0.0123414	-0.0102265	-0.00456954	0.0171783	0.014726	-0.0293789	P
312	0.0300501	0.0717863	0.0884808	0.143573	0.170284	0.188648	0.183639	0.123539	P			312	0.0270475	0.0748597	0.0761394	0.153799	0.174853	0.171469	0.168913	0.152918	P		312	0.00300262	-0.00307339	0.0123414	-0.0102265	-0.00456954	0.0171783	0.014726	-0.0293789	P			312	0.00300262	-0.00307339	0.0123414	-0.0102265	-0.00456954	0.0171783	0.014726	-0.0293789	P
313	0.0300501	0.0717863	0.0884808	0.143573	0.170284	0.188648	0.183639	0.123539	G			313	0.0270475	0.0748597	0.0761394	0.153799	0.174853	0.171469	0.168913	0.152918	G		313	0.00300262	-0.00307339	0.0123414	-0.0102265	-0.00456954	0.0171783	0.014726	-0.0293789	G			313	0.00300262	-0.00307339	0.0123414	-0.0102265	-0.00456954	0.0171783	0.014726	-0.0293789	G
314	0.0300501	0.0717863	0.0884808	0.143573	0.170284	0.188648	0.183639	0.123539	Q			314	0.0270475	0.0748597	0.0761394	0.153799	0.174853	0.171469	0.168913	0.152918	Q		314	0.00300262	-0.00307339	0.0123414	-0.0102265	-0.00456954	0.0171783	0.014726	-0.0293789	Q			314	0.00300262	-0.00307339	0.0123414	-0.0102265	-0.00456954	0.0171783	0.014726	-0.0293789	Q
315	0.0300501	0.0717863	0.0884808	0.143573	0.170284	0.188648	0.183639	0.123539	R			315	0.0270475	0.0748597	0.0761394	0.153799	0.174853	0.171469	0.168913	0.152918	R		315	0.00300262	-0.00307339	0.0123414	-0.0102265	-0.00456954	0.0171783	0.014726	-0.0293789	R			315	0.00300262	-0.00307339	0.0123414	-0.0102265	-0.00456954	0.0171783	0.014726	-0.0293789	R
316	0.0300501	0.0717863	0.0884808	0.143573	0.170284	0.188648	0.183639	0.123539	D			316	0.0270475	0.0748597	0.0761394	0.153799	0.174853	0.171469	0.168913	0.152918	D		316	0.00300262	-0.00307339	0.0123414	-0.0102265	-0.00456954	0.0171783	0.014726	-0.0293789	D			316	0.00300262	-0.00307339	0.0123414	-0.0102265	-0.00456954	0.0171783	0.014726	-0.0293789	D
317	0.0300501	0.0717863	0.0884808	0.143573	0.170284	0.188648	0.183639	0.123539	L			317	0.0270475	0.0748597	0.0761394	0.153799	0.174853	0.171469	0.168913	0.152918	L		317	0.00300262	-0.00307339	0.0123414	-0.0102265	-0.00456954	0.0171783	0.014726	-0.0293789	L			317	0.00300262	-0.00307339	0.0123414	-0.0102265	-0.00456954	0.0171783	0.014726	-0.0293789	L
318	0.0300501	0.0717863	0.0884808	0.143573	0.170284	0.188648	0.183639	0.123539	L			318	0.0270475	0.0748597	0.0761394	0.153799	0.174853	0.171469	0.168913	0.152918	L		318	0.00300262	-0.00307339	0.0123414	-0.0102265	-0.00456954	0.0171783	0.014726	-0.0293789	L			318	0.00300262	-0.00307339	0.0123414	-0.0102265	-0.00456954	0.0171783	0.014726	-0.0293789	L
319	0.02	0.12	0.11	0.185	0.17	0.155	0.15	0.09	F			319	0.0172615	0.110294	0.0972181	0.202429	0.149543	0.154396	0.144031	0.124827	F		319	0.00273855	0.00970552	0.0127819	-0.017429	0.0204566	0.000603738	0.00596928	-0.0348266	F			319	0.00273855	0.00970552	0.0127819	-0.017429	0.0204566	0.000603738	0.00596928	-0.0348266	F
320	0.010101	0.171717	0.10101	0.131313	0.141414	0.181818	0.191919	0.0707071	K			320	0.012572	0.156079	0.0775067	0.167831	0.0993876	0.171512	0.176186	0.138925	K		320	-0.00247098	0.0156383	0.0235034	-0.0365181	0.0420265	0.0103057	0.0157335	-0.0682184	K			320	-0.00247098	0.0156383	0.0235034	-0.0365181	0.0420265	0.0103057	0.0157335	-0.0682184	K
321	0.010101	0.171717	0.10101	0.131313	0.141414	0.181818	0.191919	0.0707071	D			321	0.012572	0.156079	0.0775067	0.167831	0.0993876	0.171512	0.176186	0.138925	D		321	-0.00247098	0.0156383	0.0235034	-0.0365181	0.0420265	0.0103057	0.0157335	-0.0682184	D			321	-0.00247098	0.0156383	0.0235034	-0.0365181	0.0420265	0.0103057	0.0157335	-0.0682184	D
322	0.010101	0.171717	0.10101	0.131313	0.141414	0.181818	0.191919	0.0707071	S			322	0.012572	0.156079	0.0775067	0.167831	0.0993876	0.171512	0.176186	0.138925	S		322	-0.00247098	0.0156383	0.0235034	-0.0365181	0.0420265	0.0103057	0.0157335	-0.0682184	S			322	-0.00247098	0.0156383	0.0235034	-0.0365181	0.0420265	0.0103057	0.0157335	-0.0682184	S
323	0.010101	0.171717	0.10101	0.131313	0.141414	0.181818	0.191919	0.0707071	A			323	0.012572	0.156079	0.0775067	0.167831	0.0993876	0.171512	0.176186	0.138925	A		323	-0.00247098	0.0156383	0.0235034	-0.0365181	0.0420265	0.0103057	0.0157335	-0.0682184	A			323	-0.00247098	0.0156383	0.0235034	-0.0365181	0.0420265	0.0103057	0.0157335	-0.0682184	A
324	0.010101	0.171717	0.10101	0.131313	0.141414	0.181818	0.191919	0.0707071	L			324	0.012572	0.156079	0.0775067	0.167831	0.0993876	0.171512	0.176186	0.138925	L		324	-0.00247098	0.0156383	0.0235034	-0.0365181	0.0420265	0.0103057	0.0157335	-0.0682184	L			324	-0.00247098	0.0156383	0.0235034	-0.0365181	0.0420265	0.0103057	0.0157335	-0.0682184	L
325	0.010101	0.171717	0.10101	0.131313	0.141414	0.181818	0.191919	0.0707071	G			325	0.012572	0.156079	0.0775067	0.167831	0.0993876	0.171512	0.176186	0.138925	G		325	-0.00247098	0.0156383	0.0235034	-0.0365181	0.0420265	0.0103057	0.0157335	-0.0682184	G			325	-0.00247098	0.0156383	0.0235034	-0.0365181	0.0420265	0.0103057	0.0157335	-0.0682184	G
326	0.010101	0.171717	0.10101	0.131313	0.141414	0.181818	0.191919	0.0707071	F			326	0.012572	0.156079	0.0775067	0.167831	0.0993876	0.171512	0.176186	0.138925	F		326	-0.00247098	0.0156383	0.0235034	-0.0365181	0.0420265	0.0103057	0.0157335	-0.0682184	F			326	-0.00247098	0.0156383	0.0235034	-0.0365181	0.0420265	0.0103057	0.0157335	-0.0682184	F
327	0.01	0.13	0.11	0.13	0.14	0.17	0.2	0.11	L			327	0.00529304	0.122646	0.0755135	0.140438	0.161427	0.16816	0.163176	0.163347	L		327	0.00470696	0.00735369	0.0344865	-0.0104379	-0.0214268	0.0018405	0.0368237	-0.0533466	L			327	0.00470696	0.00735369	0.0344865	-0.0104379	-0.0214268	0.0018405	0.0368237	-0.0533466	L
328	0.01	0.13	0.11	0.13	0.14	0.17	0.2	0.11	R			328	0.00529304	0.122646	0.0755135	0.140438	0.161427	0.16816	0.163176	0.163347	R		328	0.00470696	0.00735369	0.0344865	-0.0104379	-0.0214268	0.0018405	0.0368237	-0.0533466	R			328	0.00470696	0.00735369	0.0344865	-0.0104379	-0.0214268	0.0018405	0.0368237	-0.0533466	R
329	0.01	0.13	0.11	0.13	0.14	0.17	0.2	0.11	I			329	0.00529304	0.122646	0.0755135	0.140438	0.161427	0.16816	0.163176	0.163347	I		329	0.00470696	0.00735369	0.0344865	-0.0104379	-0.0214268	0.0018405	0.0368237	-0.0533466	I			329	0.00470696	0.00735369	0.0344865	-0.0104379	-0.0214268	0.0018405	0.0368237	-0.0533466	I
330	0.01	0.13	0.11	0.13	0.14	0.17	0.2	0.11	P			330	0.00529304	0.122646	0.0755135	0.140438	0.161427	0.16816	0.163176	0.163347	P		330	0.00470696	0.00735369	0.0344865	-0.0104379	-0.0214268	0.0018405	0.0368237	-0.0533466	P			330	0.00470696	0.00735369	0.0344865	-0.0104379	-0.0214268	0.0018405	0.0368237	-0.0533466	P
331	0.01	0.13	0.11	0.13	0.14	0.17	0.2	0.11	S			331	0.00529304	0.122646	0.0755135	0.140438	0.161427	0.16816	0.163176	0.163347	S		331	0.00470696	0.00735369	0.0344865	-0.0104379	-0.0214268	0.0018405	0.0368237	-0.0533466	S			331	0.00470696	0.00735369	0.0344865	-0.0104379	-0.0214268	0.0018405	0.0368237	-0.0533466	S
332	0.01	0.13	0.11	0.13	0.14	0.17	0.2	0.11	K			332	0.00529304	0.122646	0.0755135	0.140438	0.161427	0.16816	0.163176	0.163347	K		332	0.00470696	0.00735369	0.0344865	-0.0104379	-0.0214268	0.0018405	0.0368237	-0.0533466	K			332	0.00470696	0.00735369	0.0344865	-0.0104379	-0.0214268	0.0018405	0.0368237	-0.0533466	K
333	0.01	0.13	0.11	0.13	0.14	0.17	0.2	0.11	V			333	0.00529304	0.122646	0.0755135	0.140438	0.161427	0.16816	0.163176	0.163347	V		333	0.00470696	0.00735369	0.0344865	-0.0104379	-0.0214268	0.0018405	0.0368237	-0.0533466	V			333	0.00470696	0.00735369	0.0344865	-0.0104379	-0.0214268	0.0018405	0.0368237	-0.0533466	V
334	0.01	0.13	0.11	0.13	0.14	0.17	0.2	0.11	D			334	0.00529304	0.122646	0.0755135	0.140438	0.161427	0.16816	0.163176	0.163347	D		334	0.00470696	0.00735369	0.0344865	-0.0104379	-0.0214268	0.0018405	0.0368237	-0.0533466	D			334	0.00470696	0.00735369	0.0344865	-0.0104379	-0.0214268	0.0018405	0.0368237	-0.0533466	D
335	0.01	0.13	0.11	0.13	0.14	0.17	0.2	0.11	S			335	0.00529304	0.122646	0.0755135	0.140438	0.161427	0.16816	0.163176	0.163347	S		335	0.00470696	0.00735369	0.0344865	-0.0104379	-0.0214268	0.0018405	0.0368237	-0.0533466	S			335	0.00470696	0.00735369	0.0344865	-0.0104379	-0.0214268	0.0018405	0.0368237	-0.0533466	S
336	0.01	0.13	0.11	0.13	0.14	0.17	0.2	0.11	A			336	0.00529304	0.122646	0.0755135	0.140438	0.161427	0.16816	0.163176	0.163347	A		336	0.00470696	0.00735369	0.0344865	-0.0104379	-0.0214268	0.0018405	0.0368237	-0.0533466	A			336	0.00470696	0.00735369	0.0344865	-0.0104379	-0.0214268	0.0018405	0.0368237	-0.0533466	A
337	0.0268456	0.0738255	0.0939597	0.114094	0.14094	0.181208	0.184564	0.184564	L			337	0.00529304	0.122646	0.0755135	0.140438	0.161427	0.16816	0.163176	0.163347	L		337	0.0215526	-0.0488208	0.0184462	-0.0263439	-0.0204872	0.0130485	0.0213874	0.0212172	L			337	0.0215526	-0.0488208	0.0184462	-0.0263439	-0.0204872	0.0130485	0.0213874	0.0212172	L
338	0.0357143	0.07	0.0957143	0.118571	0.152857	0.195714	0.172857	0.158571	Y			338	0.025773	0.0776753	0.0782012	0.142523	0.176632	0.182194	0.183053	0.133948	Y		338	0.00994131	-0.00767535	0.017513	-0.0239519	-0.0237751	0.0135203	-0.0101958	0.0246235	Y			338	0.00994131	-0.00767535	0.017513	-0.0239519	-0.0237751	0.0135203	-0.0101958	0.0246235	Y
339	0.0357143	0.07	0.0957143	0.118571	0.152857	0.195714	0.172857	0.158571	L			339	0.025773	0.0776753	0.0782012	0.142523	0.176632	0.182194	0.183053	0.133948	L		339	0.00994131	-0.00767535	0.017513	-0.0239519	-0.0237751	0.0135203	-0.0101958	0.0246235	L			339	0.00994131	-0.00767535	0.017513	-0.0239519	-0.0237751	0.0135203	-0.0101958	0.0246235	L
340	0.0357143	0.07	0.0957143	0.118571	0.152857	0.195714	0.172857	0.158571	G			340	0.025773	0.0776753	0.0782012	0.142523	0.176632	0.182194	0.183053	0.133948	G		340	0.00994131	-0.00767535	0.017513	-0.0239519	-0.0237751	0.0135203	-0.0101958	0.0246235	G			340	0.00994131	-0.00767535	0.017513	-0.0239519	-0.0237751	0.0135203	-0.0101958	0.0246235	G
341	0.0357143	0.07	0.0957143	0.118571	0.152857	0.195714	0.172857	0.158571	S			341	0.025773	0.0776753	0.0782012	0.142523	0.176632	0.182194	0.183053	0.133948	S		341	0.00994131	-0.00767535	0.017513	-0.0239519	-0.0237751	0.0135203	-0.0101958	0.0246235	S			341	0.00994131	-0.00767535	0.017513	-0.0239519	-0.0237751	0.0135203	-0.0101958	0.0246235	S
342	0.0357143	0.07	0.0957143	0.118571	0.152857	0.195714	0.172857	0.158571	R			342	0.025773	0.0776753	0.0782012	0.142523	0.176632	0.182194	0.183053	0.133948	R		342	0.00994131	-0.00767535	0.017513	-0.0239519	-0.0237751	0.0135203	-0.0101958	0.0246235	R			342	0.00994131	-0.00767535	0.017513	-0.0239519	-0.0237751	0.0135203	-0.0101958	0.0246235	R
343	0.0357143	0.07	0.0957143	0.118571	0.152857	0.195714	0.172857	0.158571	Y			343	0.025773	0.0776753	0.0782012	0.142523	0.176632	0.182194	0.183053	0.133948	Y		343	0.00994131	-0.00767535	0.017513	-0.0239519	-0.0237751	0.0135203	-0.0101958	0.0246235	Y			343	0.00994131	-0.00767535	0.017513	-0.0239519	-0.0237751	0.0135203	-0.0101958	0.0246235	Y
344	0.0300501	0.0517529	0.0851419	0.126878	0.18197	0.217028	0.191987	0.115192	L			344	0.0198756	0.0557143	0.0611595	0.152847	0.19674	0.195331	0.193318	0.125015	L		344	0.0101745	-0.00396139	0.0239824	-0.0259688	-0.0147704	0.0216979	-0.00133117	-0.00982297	L			344	0.0101745	-0.00396139	0.0239824	-0.0259688	-0.0147704	0.0216979	-0.00133117	-0.00982297	L
345	0.0300501	0.0517529	0.0851419	0.126878	0.18197	0.217028	0.191987	0.115192	T			345	0.0198756	0.0557143	0.0611595	0.152847	0.19674	0.195331	0.193318	0.125015	T		345	0.0101745	-0.00396139	0.0239824	-0.0259688	-0.0147704	0.0216979	-0.00133117	-0.00982297	T			345	0.0101745	-0.00396139	0.0239824	-0.0259688	-0.0147704	0.0216979	-0.00133117	-0.00982297	T
346	0.0300501	0.0517529	0.0851419	0.126878	0.18197	0.217028	0.191987	0.115192	T			346	0.0198756	0.0557143	0.0611595	0.152847	0.19674	0.195331	0.193318	0.125015	T		346	0.0101745	-0.00396139	0.0239824	-0.0259688	-0.0147704	0.0216979	-0.00133117	-0.00982297	T			346	0.0101745	-0.00396139	0.0239824	-0.0259688	-0.0147704	0.0216979	-0.00133117	-0.00982297	T
347	0.0279441	0.0419162	0.0778443	0.125749	0.179641	0.215569	0.193613	0.137725	L			347	0.0169089	0.049386	0.0513716	0.151516	0.19504	0.184917	0.185085	0.165775	L		347	0.0110352	-0.00746984	0.0264727	-0.025768	-0.0153993	0.0306523	0.00852783	-0.0280509	L			347	0.0110352	-0.00746984	0.0264727	-0.025768	-0.0153993	0.0306523	0.00852783	-0.0280509	L
348	0.026	0.034	0.064	0.11	0.172	0.212	0.216	0.166	K			348	0.0153891	0.0430462	0.040203	0.129348	0.184748	0.195983	0.197759	0.193524	K		348	0.0106109	-0.00904624	0.023797	-0.0193481	-0.0127484	0.0160175	0.0182411	-0.0275238	K			348	0.0106109	-0.00904624	0.023797	-0.0193481	-0.0127484	0.0160175	0.0182411	-0.0275238	K
349	0.026	0.034	0.064	0.11	0.172	0.212	0.216	0.166	N			349	0.0153891	0.0430462	0.040203	0.129348	0.184748	0.195983	0.197759	0.193524	N		349	0.0106109	-0.00904624	0.023797	-0.0193481	-0.0127484	0.0160175	0.0182411	-0.0275238	N			349	0.0106109	-0.00904624	0.023797	-0.0193481	-0.0127484	0.0160175	0.0182411	-0.0275238	N
350	0.026	0.034	0.064	0.11	0.172	0.212	0.216	0.166	L			350	0.0153891	0.0430462	0.040203	0.129348	0.184748	0.195983	0.197759	0.193524	L		350	0.0106109	-0.00904624	0.023797	-0.0193481	-0.0127484	0.0160175	0.0182411	-0.0275238	L			350	0.0106109	-0.00904624	0.023797	-0.0193481	-0.0127484	0.0160175	0.0182411	-0.0275238	L
351	0.026	0.034	0.064	0.11	0.172	0.212	0.216	0.166	R			351	0.0153891	0.0430462	0.040203	0.129348	0.184748	0.195983	0.197759	0.193524	R		351	0.0106109	-0.00904624	0.023797	-0.0193481	-0.0127484	0.0160175	0.0182411	-0.0275238	R			351	0.0106109	-0.00904624	0.023797	-0.0193481	-0.0127484	0.0160175	0.0182411	-0.0275238	R
352	0.026	0.034	0.064	0.11	0.172	0.212	0.216	0.166	E			352	0.0153891	0.0430462	0.040203	0.129348	0.184748	0.195983	0.197759	0.193524	E		352	0.0106109	-0.00904624	0.023797	-0.0193481	-0.0127484	0.0160175	0.0182411	-0.0275238	E			352	0.0106109	-0.00904624	0.023797	-0.0193481	-0.0127484	0.0160175	0.0182411	-0.0275238	E
353	0.0275689	0.0300752	0.0676692	0.112782	0.185464	0.210526	0.210526	0.155388	T			353	0.0152961	0.0389269	0.0402331	0.139515	0.198344	0.196669	0.195667	0.175348	T		353	0.0122728	-0.00885172	0.027436	-0.0267335	-0.0128803	0.013857	0.0148592	-0.0199594	T			353	0.0122728	-0.00885172	0.027436	-0.0267335	-0.0128803	0.013857	0.0148592	-0.0199594	T
354	0.0275689	0.0300752	0.0676692	0.112782	0.185464	0.210526	0.210526	0.155388	A			354	0.0152961	0.0389269	0.0402331	0.139515	0.198344	0.196669	0.195667	0.175348	A		354	0.0122728	-0.00885172	0.027436	-0.0267335	-0.0128803	0.013857	0.0148592	-0.0199594	A			354	0.0122728	-0.00885172	0.027436	-0.0267335	-0.0128803	0.013857	0.0148592	-0.0199594	A
355	0.0275689	0.0300752	0.0676692	0.112782	0.185464	0.210526	0.210526	0.155388	E			355	0.0152961	0.0389269	0.0402331	0.139515	0.198344	0.196669	0.195667	0.175348	E		355	0.0122728	-0.00885172	0.027436	-0.0267335	-0.0128803	0.013857	0.0148592	-0.0199594	E			355	0.0122728	-0.00885172	0.027436	-0.0267335	-0.0128803	0.013857	0.0148592	-0.0199594	E
356	0.02	0.025	0.045	0.105	0.145	0.235	0.22	0.205	E			356	0.0149116	0.0343101	0.0346926	0.114411	0.152075	0.228927	0.201743	0.21893	E		356	0.00508842	-0.00931013	0.0103074	-0.00941101	-0.00707498	0.0060735	0.018257	-0.0139303	E			356	0.00508842	-0.00931013	0.0103074	-0.00941101	-0.00707498	0.0060735	0.018257	-0.0139303	E
357	0.0196078	0.0294118	0.0294118	0.0686275	0.107843	0.22549	0.235294	0.284314	V			357	0.0163915	0.0379667	0.0212274	0.06259	0.116799	0.209621	0.192294	0.343111	V		357	0.00321636	-0.0085549	0.00818434	0.00603746	-0.00895571	0.0158689	0.0430004	-0.0587969	V			357	0.00321636	-0.0085549	0.00818434	0.00603746	-0.00895571	0.0158689	0.0430004	-0.0587969	V
358	0.0196078	0.0294118	0.0294118	0.0686275	0.107843	0.22549	0.235294	0.284314	K			358	0.0163915	0.0379667	0.0212274	0.06259	0.116799	0.209621	0.192294	0.343111	K		358	0.00321636	-0.0085549	0.00818434	0.00603746	-0.00895571	0.0158689	0.0430004	-0.0587969	K			358	0.00321636	-0.0085549	0.00818434	0.00603746	-0.00895571	0.0158689	0.0430004	-0.0587969	K
359	0.0196078	0.0294118	0.0294118	0.0686275	0.107843	0.22549	0.235294	0.284314	A			359	0.0163915	0.0379667	0.0212274	0.06259	0.116799	0.209621	0.192294	0.343111	A		359	0.00321636	-0.0085549	0.00818434	0.00603746	-0.00895571	0.0158689	0.0430004	-0.0587969	A			359	0.00321636	-0.0085549	0.00818434	0.00603746	-0.00895571	0.0158689	0.0430004	-0.0587969	A
360	0.0196078	0.0294118	0.0294118	0.0686275	0.107843	0.22549	0.235294	0.284314	R			360	0.0163915	0.0379667	0.0212274	0.06259	0.116799	0.209621	0.192294	0.343111	R		360	0.00321636	-0.0085549	0.00818434	0.00603746	-0.00895571	0.0158689	0.0430004	-0.0587969	R			360	0.00321636	-0.0085549	0.00818434	0.00603746	-0.00895571	0.0158689	0.0430004	-0.0587969	R
361	0.0196078	0.0294118	0.0294118	0.0686275	0.107843	0.22549	0.235294	0.284314	Y			361	0.0163915	0.0379667	0.0212274	0.06259	0.116799	0.209621	0.192294	0.343111	Y		361	0.00321636	-0.0085549	0.00818434	0.00603746	-0.00895571	0.0158689	0.0430004	-0.0587969	Y			361	0.00321636	-0.0085549	0.00818434	0.00603746	-0.00895571	0.0158689	0.0430004	-0.0587969	Y
362	0.0196078	0.0294118	0.0294118	0.0686275	0.107843	0.22549	0.235294	0.284314	T			362	0.0163915	0.0379667	0.0212274	0.06259	0.116799	0.209621	0.192294	0.343111	T		362	0.00321636	-0.0085549	0.00818434	0.00603746	-0.00895571	0.0158689	0.0430004	-0.0587969	T			362	0.00321636	-0.0085549	0.00818434	0.00603746	-0.00895571	0.0158689	0.0430004	-0.0587969	T
363	0.0196078	0.0294118	0.0294118	0.0686275	0.107843	0.22549	0.235294	0.284314	R			363	0.0163915	0.0379667	0.0212274	0.06259	0.116799	0.209621	0.192294	0.343111	R		363	0.00321636	-0.0085549	0.00818434	0.00603746	-0.00895571	0.0158689	0.0430004	-0.0587969	R			363	0.00321636	-0.0085549	0.00818434	0.00603746	-0.00895571	0.0158689	0.0430004	-0.0587969	R
364	0.0196078	0.0294118	0.0294118	0.0686275	0.107843	0.22549	0.235294	0.284314	V			364	0.0163915	0.0379667	0.0212274	0.06259	0.116799	0.209621	0.192294	0.343111	V		364	0.00321636	-0.0085549	0.00818434	0.00603746	-0.00895571	0.0158689	0.0430004	-0.0587969	V			364	0.00321636	-0.0085549	0.00818434	0.00603746	-0.00895571	0.0158689	0.0430004	-0.0587969	V
365	0	0	0	0	0	0	0	0	V			365	0	0	0	0	0	0	0	0	V		365									V			365									V
366	0	0	0	0	0	0	0	0	W			366	0	0	0	0	0	0	0	0	W		366									W			366									W
367	0	0	0	0	0	0	0	0	C			367	0	0	0	0	0	0	0	0	C		367									C			367									C
368	0	0	0	0	0	0	0	0	A			368	0	0	0	0	0	0	0	0	A		368									A			368									A
369	0	0	0	0	0	0	0	0	V			369	0	0	0	0	0	0	0	0	V		369									V			369									V
370	0	0	0	0	0	0	0	0	G			370	0	0	0	0	0	0	0	0	G		370									G			370									G
371	0	0	0	0	0	0	0	0	P			371	0	0	0	0	0	0	0	0	P		371									P			371									P
372	0	0	0	0	0	0	0	0	E			372	0	0	0	0	0	0	0	0	E		372									E			372									E
373	0	0	0	0	0	0	0	0	E			373	0	0	0	0	0	0	0	0	E		373									E			373									E
374	0	0	0	0	0	0	0	0	Q			374	0	0	0	0	0	0	0	0	Q		374									Q			374									Q
375	0	0	0	0	0	0	0	0	K			375	0	0	0	0	0	0	0	0	K		375									K			375									K
376	0	0	0	0	0	0	0	0	K			376	0	0	0	0	0	0	0	0	K		376									K			376									K
377	0	0	0	0	0	0	0	0	C			377	0	0	0	0	0	0	0	0	C		377									C			377									C
378	0	0	0	0	0	0	0	0	Q			378	0	0	0	0	0	0	0	0	Q		378									Q			378									Q
379	0	0	0	0	0	0	0	0	Q			379	0	0	0	0	0	0	0	0	Q		379									Q			379									Q
380	0	0	0	0	0	0	0	0	W			380	0	0	0	0	0	0	0	0	W		380									W			380									W
381	0	0	0	0	0	0	0	0	S			381	0	0	0	0	0	0	0	0	S		381									S			381									S
382	0	0	0	0	0	0	0	0	Q			382	0	0	0	0	0	0	0	0	Q		382									Q			382									Q
383	0	0	0	0	0	0	0	0	Q			383	0	0	0	0	0	0	0	0	Q		383									Q			383									Q
384	0	0	0	0	0	0	0	0	S			384	0	0	0	0	0	0	0	0	S		384									S			384									S
385	0	0	0	0	0	0	0	0	G			385	0	0	0	0	0	0	0	0	G		385									G			385									G
386	0	0	0	0	0	0	0	0	Q			386	0	0	0	0	0	0	0	0	Q		386									Q			386									Q
387	0	0	0	0	0	0	0	0	N			387	0	0	0	0	0	0	0	0	N		387									N			387									N
388	0	0	0	0	0	0	0	0	V			388	0	0	0	0	0	0	0	0	V		388									V			388									V
389	0	0	0	0	0	0	0	0	T			389	0	0	0	0	0	0	0	0	T		389									T			389									T
390	0	0	0	0	0	0	0	0	C			390	0	0	0	0	0	0	0	0	C		390									C			390									C
391	0	0	0	0	0	0	0	0	A			391	0	0	0	0	0	0	0	0	A		391									A			391									A
392	0	0	0	0	0	0	0	0	T			392	0	0	0	0	0	0	0	0	T		392									T			392									T
393	0	0	0	0	0	0	0	0	A			393	0	0	0	0	0	0	0	0	A		393									A			393									A
394	0	0	0	0	0	0	0	0	S			394	0	0	0	0	0	0	0	0	S		394									S			394									S
395	0	0	0	0	0	0	0	0	T			395	0	0	0	0	0	0	0	0	T		395									T			395									T
396	0	0	0	0	0	0	0	0	T			396	0	0	0	0	0	0	0	0	T		396									T			396									T
397	0	0	0	0	0	0	0	0	D			397	0	0	0	0	0	0	0	0	D		397									D			397									D
398	0	0	0	0	0	0	0	0	D			398	0	0	0	0	0	0	0	0	D		398									D			398									D
399	0	0	0	0	0	0	0	0	C			399	0	0	0	0	0	0	0	0	C		399									C			399									C
400	0	0	0	0	0	0	0	0	I			400	0	0	0	0	0	0	0	0	I		400									I			400									I
401	0	0	0	0	0	0	0	0	V			401	0	0	0	0	0	0	0	0	V		401									V			401									V
402	0	0	0	0	0	0	0	0	L			402	0	0	0	0	0	0	0	0	L		402									L			402									L
403	0.018	0.028	0.076	0.21	0.196	0.176	0.16	0.136	V			403	0.0099873	0.0314275	0.0539176	0.192784	0.222729	0.180042	0.172867	0.136246	V		403	0.0080127	-0.00342751	0.0220824	0.0172158	-0.0267286	-0.00404218	-0.0128669	-0.000245669	V			403	0.0080127	-0.00342751	0.0220824	0.0172158	-0.0267286	-0.00404218	-0.0128669	-0.000245669	V
404	0.018	0.028	0.076	0.21	0.196	0.176	0.16	0.136	L			404	0.0099873	0.0314275	0.0539176	0.192784	0.222729	0.180042	0.172867	0.136246	L		404	0.0080127	-0.00342751	0.0220824	0.0172158	-0.0267286	-0.00404218	-0.0128669	-0.000245669	L			404	0.0080127	-0.00342751	0.0220824	0.0172158	-0.0267286	-0.00404218	-0.0128669	-0.000245669	L
405	0.01625	0.02375	0.06875	0.21625	0.20125	0.18	0.16125	0.1325	K			405	0.00814077	0.0273778	0.0487418	0.192694	0.231111	0.191582	0.161797	0.138556	K		405	0.00810923	-0.00362778	0.0200082	0.0235565	-0.029861	-0.0115819	-0.00054741	-0.00605574	K			405	0.00810923	-0.00362778	0.0200082	0.0235565	-0.029861	-0.0115819	-0.00054741	-0.00605574	K
406	0.01625	0.02375	0.06875	0.21625	0.20125	0.18	0.16125	0.1325	G			406	0.00814077	0.0273778	0.0487418	0.192694	0.231111	0.191582	0.161797	0.138556	G		406	0.00810923	-0.00362778	0.0200082	0.0235565	-0.029861	-0.0115819	-0.00054741	-0.00605574	G			406	0.00810923	-0.00362778	0.0200082	0.0235565	-0.029861	-0.0115819	-0.00054741	-0.00605574	G
407	0.01625	0.02375	0.06875	0.21625	0.20125	0.18	0.16125	0.1325	E			407	0.00814077	0.0273778	0.0487418	0.192694	0.231111	0.191582	0.161797	0.138556	E		407	0.00810923	-0.00362778	0.0200082	0.0235565	-0.029861	-0.0115819	-0.00054741	-0.00605574	E			407	0.00810923	-0.00362778	0.0200082	0.0235565	-0.029861	-0.0115819	-0.00054741	-0.00605574	E
408	0.01625	0.02375	0.06875	0.21625	0.20125	0.18	0.16125	0.1325	A			408	0.00814077	0.0273778	0.0487418	0.192694	0.231111	0.191582	0.161797	0.138556	A		408	0.00810923	-0.00362778	0.0200082	0.0235565	-0.029861	-0.0115819	-0.00054741	-0.00605574	A			408	0.00810923	-0.00362778	0.0200082	0.0235565	-0.029861	-0.0115819	-0.00054741	-0.00605574	A
409	0.02	0.0336364	0.0618182	0.183636	0.196364	0.187273	0.180909	0.136364	D			409	0.00747907	0.0276955	0.0423275	0.181389	0.225812	0.204604	0.167929	0.142765	D		409	0.0125209	0.00594083	0.0194907	0.00224774	-0.029448	-0.0173313	0.0129804	-0.00640125	D			409	0.0125209	0.00594083	0.0194907	0.00224774	-0.029448	-0.0173313	0.0129804	-0.00640125	D
410	0.025	0.0383333	0.0633333	0.179167	0.190833	0.181667	0.18	0.141667	A			410	0.00747907	0.0276955	0.0423275	0.181389	0.225812	0.204604	0.167929	0.142765	A		410	0.0175209	0.0106378	0.0210059	-0.00222196	-0.0349783	-0.0229374	0.0120713	-0.00109822	A			410	0.0175209	0.0106378	0.0210059	-0.00222196	-0.0349783	-0.0229374	0.0120713	-0.00109822	A
411	0.0271235	0.0399714	0.0649536	0.17202	0.182727	0.182727	0.18344	0.147038	L			411	0.00913087	0.0316508	0.0426983	0.172459	0.218009	0.204829	0.16985	0.151373	L		411	0.0179926	0.0083206	0.0222553	-0.000438783	-0.0352823	-0.0221025	0.0135903	-0.00433518	L			411	0.0179926	0.0083206	0.0222553	-0.000438783	-0.0352823	-0.0221025	0.0135903	-0.00433518	L
412	0.0306462	0.0426382	0.065956	0.166556	0.177215	0.184544	0.189873	0.142572	N			412	0.00903803	0.031767	0.0438902	0.179061	0.225343	0.203175	0.164974	0.142753	N		412	0.0216082	0.0108712	0.0220658	-0.0125053	-0.0481273	-0.0186311	0.0248995	-0.000180902	N			412	0.0216082	0.0108712	0.0220658	-0.0125053	-0.0481273	-0.0186311	0.0248995	-0.000180902	N
413	0.0306462	0.0426382	0.065956	0.166556	0.177215	0.184544	0.189873	0.142572	L			413	0.00903803	0.031767	0.0438902	0.179061	0.225343	0.203175	0.164974	0.142753	L		413	0.0216082	0.0108712	0.0220658	-0.0125053	-0.0481273	-0.0186311	0.0248995	-0.000180902	L			413	0.0216082	0.0108712	0.0220658	-0.0125053	-0.0481273	-0.0186311	0.0248995	-0.000180902	L
414	0.0353846	0.0453846	0.0707692	0.175385	0.178462	0.177692	0.180769	0.136154	D			414	0.00937503	0.0320454	0.0487729	0.200116	0.243897	0.195366	0.146918	0.12351	D		414	0.0260096	0.0133392	0.0219963	-0.0247312	-0.0654353	-0.0176738	0.0338511	0.0126441	D			414	0.0260096	0.0133392	0.0219963	-0.0247312	-0.0654353	-0.0176738	0.0338511	0.0126441	D
415	0.0353846	0.0453846	0.0707692	0.175385	0.178462	0.177692	0.180769	0.136154	G			415	0.00937503	0.0320454	0.0487729	0.200116	0.243897	0.195366	0.146918	0.12351	G		415	0.0260096	0.0133392	0.0219963	-0.0247312	-0.0654353	-0.0176738	0.0338511	0.0126441	G			415	0.0260096	0.0133392	0.0219963	-0.0247312	-0.0654353	-0.0176738	0.0338511	0.0126441	G
416	0.0353846	0.0453846	0.0707692	0.175385	0.178462	0.177692	0.180769	0.136154	G			416	0.00937503	0.0320454	0.0487729	0.200116	0.243897	0.195366	0.146918	0.12351	G		416	0.0260096	0.0133392	0.0219963	-0.0247312	-0.0654353	-0.0176738	0.0338511	0.0126441	G			416	0.0260096	0.0133392	0.0219963	-0.0247312	-0.0654353	-0.0176738	0.0338511	0.0126441	G
417	0.0353846	0.0453846	0.0707692	0.175385	0.178462	0.177692	0.180769	0.136154	Y			417	0.00937503	0.0320454	0.0487729	0.200116	0.243897	0.195366	0.146918	0.12351	Y		417	0.0260096	0.0133392	0.0219963	-0.0247312	-0.0654353	-0.0176738	0.0338511	0.0126441	Y			417	0.0260096	0.0133392	0.0219963	-0.0247312	-0.0654353	-0.0176738	0.0338511	0.0126441	Y
418	0.0501002	0.0641283	0.0721443	0.102204	0.134269	0.188377	0.218437	0.170341	I			418	0.0155328	0.0495204	0.090236	0.113428	0.303838	0.159336	0.124094	0.144014	I		418	0.0345674	0.0146078	-0.0180917	-0.0112236	-0.16957	0.0290403	0.094343	0.0263268	I			418	0.0345674	0.0146078	-0.0180917	-0.0112236	-0.16957	0.0290403	0.094343	0.0263268	I
419	0.0501002	0.0641283	0.0721443	0.102204	0.134269	0.188377	0.218437	0.170341	Y			419	0.0155328	0.0495204	0.090236	0.113428	0.303838	0.159336	0.124094	0.144014	Y		419	0.0345674	0.0146078	-0.0180917	-0.0112236	-0.16957	0.0290403	0.094343	0.0263268	Y			419	0.0345674	0.0146078	-0.0180917	-0.0112236	-0.16957	0.0290403	0.094343	0.0263268	Y
420	0.020202	0.0505051	0.0909091	0.171717	0.151515	0.151515	0.151515	0.212121	T			420	0.0155328	0.0495204	0.090236	0.113428	0.303838	0.159336	0.124094	0.144014	T		420	0.00466922	0.00098463	0.000673065	0.0582892	-0.152323	-0.0078213	0.0274213	0.0681073	T			420	0.00466922	0.00098463	0.000673065	0.0582892	-0.152323	-0.0078213	0.0274213	0.0681073	T
421	0.020202	0.0505051	0.0909091	0.171717	0.151515	0.151515	0.151515	0.212121	A			421	0.0155328	0.0495204	0.090236	0.113428	0.303838	0.159336	0.124094	0.144014	A		421	0.00466922	0.00098463	0.000673065	0.0582892	-0.152323	-0.0078213	0.0274213	0.0681073	A			421	0.00466922	0.00098463	0.000673065	0.0582892	-0.152323	-0.0078213	0.0274213	0.0681073	A
422	0.020202	0.0505051	0.0909091	0.171717	0.151515	0.151515	0.151515	0.212121	G			422	0.0155328	0.0495204	0.090236	0.113428	0.303838	0.159336	0.124094	0.144014	G		422	0.00466922	0.00098463	0.000673065	0.0582892	-0.152323	-0.0078213	0.0274213	0.0681073	G			422	0.00466922	0.00098463	0.000673065	0.0582892	-0.152323	-0.0078213	0.0274213	0.0681073	G
423	0.020202	0.0505051	0.0909091	0.171717	0.151515	0.151515	0.151515	0.212121	K			423	0.0155328	0.0495204	0.090236	0.113428	0.303838	0.159336	0.124094	0.144014	K		423	0.00466922	0.00098463	0.000673065	0.0582892	-0.152323	-0.0078213	0.0274213	0.0681073	K			423	0.00466922	0.00098463	0.000673065	0.0582892	-0.152323	-0.0078213	0.0274213	0.0681073	K
424	0.020202	0.0505051	0.0909091	0.171717	0.151515	0.151515	0.151515	0.212121	C			424	0.0155328	0.0495204	0.090236	0.113428	0.303838	0.159336	0.124094	0.144014	C		424	0.00466922	0.00098463	0.000673065	0.0582892	-0.152323	-0.0078213	0.0274213	0.0681073	C			424	0.00466922	0.00098463	0.000673065	0.0582892	-0.152323	-0.0078213	0.0274213	0.0681073	C
425	0.020202	0.0505051	0.0909091	0.171717	0.151515	0.151515	0.151515	0.212121	G			425	0.0155328	0.0495204	0.090236	0.113428	0.303838	0.159336	0.124094	0.144014	G		425	0.00466922	0.00098463	0.000673065	0.0582892	-0.152323	-0.0078213	0.0274213	0.0681073	G			425	0.00466922	0.00098463	0.000673065	0.0582892	-0.152323	-0.0078213	0.0274213	0.0681073	G
426	0.020202	0.0505051	0.0909091	0.171717	0.151515	0.151515	0.151515	0.212121	L			426	0.0155328	0.0495204	0.090236	0.113428	0.303838	0.159336	0.124094	0.144014	L		426	0.00466922	0.00098463	0.000673065	0.0582892	-0.152323	-0.0078213	0.0274213	0.0681073	L			426	0.00466922	0.00098463	0.000673065	0.0582892	-0.152323	-0.0078213	0.0274213	0.0681073	L
427	0.020202	0.0505051	0.0909091	0.171717	0.151515	0.151515	0.151515	0.212121	V			427	0.0155328	0.0495204	0.090236	0.113428	0.303838	0.159336	0.124094	0.144014	V		427	0.00466922	0.00098463	0.000673065	0.0582892	-0.152323	-0.0078213	0.0274213	0.0681073	V			427	0.00466922	0.00098463	0.000673065	0.0582892	-0.152323	-0.0078213	0.0274213	0.0681073	V
428	0.020202	0.0505051	0.0909091	0.171717	0.151515	0.151515	0.151515	0.212121	P			428	0.0155328	0.0495204	0.090236	0.113428	0.303838	0.159336	0.124094	0.144014	P		428	0.00466922	0.00098463	0.000673065	0.0582892	-0.152323	-0.0078213	0.0274213	0.0681073	P			428	0.00466922	0.00098463	0.000673065	0.0582892	-0.152323	-0.0078213	0.0274213	0.0681073	P
429	0.020202	0.0505051	0.0909091	0.171717	0.151515	0.151515	0.151515	0.212121	V			429	0.0155328	0.0495204	0.090236	0.113428	0.303838	0.159336	0.124094	0.144014	V		429	0.00466922	0.00098463	0.000673065	0.0582892	-0.152323	-0.0078213	0.0274213	0.0681073	V			429	0.00466922	0.00098463	0.000673065	0.0582892	-0.152323	-0.0078213	0.0274213	0.0681073	V
430	0.020202	0.0505051	0.0909091	0.171717	0.151515	0.151515	0.151515	0.212121	L			430	0.0155328	0.0495204	0.090236	0.113428	0.303838	0.159336	0.124094	0.144014	L		430	0.00466922	0.00098463	0.000673065	0.0582892	-0.152323	-0.0078213	0.0274213	0.0681073	L			430	0.00466922	0.00098463	0.000673065	0.0582892	-0.152323	-0.0078213	0.0274213	0.0681073	L
431	0	0	0	0	0	0	0	0	A			431	0	0	0	0	0	0	0	0	A		431									A			431									A
432	0	0	0	0	0	0	0	0	E			432	0	0	0	0	0	0	0	0	E		432									E			432									E
433	0	0	0	0	0	0	0	0	N			433	0	0	0	0	0	0	0	0	N		433									N			433									N
434	0	0	0	0	0	0	0	0	R			434	0	0	0	0	0	0	0	0	R		434									R			434									R
435	0	0	0	0	0	0	0	0	K			435	0	0	0	0	0	0	0	0	K		435									K			435									K
436	0	0	0	0	0	0	0	0	T			436	0	0	0	0	0	0	0	0	T		436									T			436									T
437	0	0	0	0	0	0	0	0	S			437	0	0	0	0	0	0	0	0	S		437									S			437									S
438	0	0	0	0	0	0	0	0	K			438	0	0	0	0	0	0	0	0	K		438									K			438									K
439	0	0	0	0	0	0	0	0	H			439	0	0	0	0	0	0	0	0	H		439									H			439									H
440	0	0	0	0	0	0	0	0	S			440	0	0	0	0	0	0	0	0	S		440									S			440									S
441	0	0	0	0	0	0	0	0	S			441	0	0	0	0	0	0	0	0	S		441									S			441									S
442	0	0	0	0	0	0	0	0	L			442	0	0	0	0	0	0	0	0	L		442									L			442									L
443	0	0	0	0	0	0	0	0	D			443	0	0	0	0	0	0	0	0	D		443									D			443									D
444	0	0	0	0	0	0	0	0	C			444	0	0	0	0	0	0	0	0	C		444									C			444									C
445	0	0	0	0	0	0	0	0	V			445	0	0	0	0	0	0	0	0	V		445									V			445									V
446	0	0	0	0	0	0	0	0	L			446	0	0	0	0	0	0	0	0	L		446									L			446									L
447	0	0	0	0	0	0	0	0	R			447	0	0	0	0	0	0	0	0	R		447									R			447									R
448	0	0	0	0	0	0	0	0	P			448	0	0	0	0	0	0	0	0	P		448									P			448									P
449	0	0	0	0	0	0	0	0	T			449	0	0	0	0	0	0	0	0	T		449									T			449									T
450	0	0	0	0	0	0	0	0	E			450	0	0	0	0	0	0	0	0	E		450									E			450									E
451	0	0	0	0	0	0	0	0	G			451	0	0	0	0	0	0	0	0	G		451									G			451									G
452	0.08	0.09	0.19	0.13	0.11	0.13	0.16	0.11	Y			452	0.0347433	0.117861	0.137346	0.144701	0.132972	0.13107	0.149272	0.152035	Y		452	0.0452567	-0.027861	0.0526538	-0.0147009	-0.0229719	-0.0010698	0.0107281	-0.042035	Y			452	0.0452567	-0.027861	0.0526538	-0.0147009	-0.0229719	-0.0010698	0.0107281	-0.042035	Y
453	0.08	0.09	0.19	0.13	0.11	0.13	0.16	0.11	L			453	0.0347433	0.117861	0.137346	0.144701	0.132972	0.13107	0.149272	0.152035	L		453	0.0452567	-0.027861	0.0526538	-0.0147009	-0.0229719	-0.0010698	0.0107281	-0.042035	L			453	0.0452567	-0.027861	0.0526538	-0.0147009	-0.0229719	-0.0010698	0.0107281	-0.042035	L
454	0.08	0.09	0.19	0.13	0.11	0.13	0.16	0.11	A			454	0.0347433	0.117861	0.137346	0.144701	0.132972	0.13107	0.149272	0.152035	A		454	0.0452567	-0.027861	0.0526538	-0.0147009	-0.0229719	-0.0010698	0.0107281	-0.042035	A			454	0.0452567	-0.027861	0.0526538	-0.0147009	-0.0229719	-0.0010698	0.0107281	-0.042035	A
455	0.08	0.09	0.19	0.13	0.11	0.13	0.16	0.11	V			455	0.0347433	0.117861	0.137346	0.144701	0.132972	0.13107	0.149272	0.152035	V		455	0.0452567	-0.027861	0.0526538	-0.0147009	-0.0229719	-0.0010698	0.0107281	-0.042035	V			455	0.0452567	-0.027861	0.0526538	-0.0147009	-0.0229719	-0.0010698	0.0107281	-0.042035	V
456	0.08	0.09	0.19	0.13	0.11	0.13	0.16	0.11	A			456	0.0347433	0.117861	0.137346	0.144701	0.132972	0.13107	0.149272	0.152035	A		456	0.0452567	-0.027861	0.0526538	-0.0147009	-0.0229719	-0.0010698	0.0107281	-0.042035	A			456	0.0452567	-0.027861	0.0526538	-0.0147009	-0.0229719	-0.0010698	0.0107281	-0.042035	A
457	0	0	0	0	0	0	0	0	V			457	0	0	0	0	0	0	0	0	V		457									V			457									V
458	0	0	0	0	0	0	0	0	V			458	0	0	0	0	0	0	0	0	V		458									V			458									V
459	0	0	0	0	0	0	0	0	K			459	0	0	0	0	0	0	0	0	K		459									K			459									K
460	0	0	0	0	0	0	0	0	K			460	0	0	0	0	0	0	0	0	K		460									K			460									K
461	0	0	0	0	0	0	0	0	A			461	0	0	0	0	0	0	0	0	A		461									A			461									A
462	0	0	0	0	0	0	0	0	N			462	0	0	0	0	0	0	0	0	N		462									N			462									N
463	0	0	0	0	0	0	0	0	E			463	0	0	0	0	0	0	0	0	E		463									E			463									E
464	0	0	0	0	0	0	0	0	G			464	0	0	0	0	0	0	0	0	G		464									G			464									G
465	0	0	0	0	0	0	0	0	L			465	0	0	0	0	0	0	0	0	L		465									L			465									L
466	0	0	0	0	0	0	0	0	T			466	0	0	0	0	0	0	0	0	T		466									T			466									T
467	0	0	0	0	0	0	0	0	W			467	0	0	0	0	0	0	0	0	W		467									W			467									W
468	0	0	0	0	0	0	0	0	N			468	0	0	0	0	0	0	0	0	N		468									N			468									N
469	0	0	0	0	0	0	0	0	S			469	0	0	0	0	0	0	0	0	S		469									S			469									S
470	0	0	0	0	0	0	0	0	L			470	0	0	0	0	0	0	0	0	L		470									L			470									L
471	0	0	0	0	0	0	0	0	K			471	0	0	0	0	0	0	0	0	K		471									K			471									K
472	0	0	0	0	0	0	0	0	D			472	0	0	0	0	0	0	0	0	D		472									D			472									D
473	0	0	0	0	0	0	0	0	K			473	0	0	0	0	0	0	0	0	K		473									K			473									K
474	0	0	0	0	0	0	0	0	K			474	0	0	0	0	0	0	0	0	K		474									K			474									K
475	0	0	0	0	0	0	0	0	S			475	0	0	0	0	0	0	0	0	S		475									S			475									S
476	0	0	0	0	0	0	0	0	C			476	0	0	0	0	0	0	0	0	C		476									C			476									C
477	0	0	0	0	0	0	0	0	H			477	0	0	0	0	0	0	0	0	H		477									H			477									H
478	0	0	0	0	0	0	0	0	T			478	0	0	0	0	0	0	0	0	T		478									T			478									T
479	0	0	0	0	0	0	0	0	A			479	0	0	0	0	0	0	0	0	A		479									A			479									A
480	0	0	0	0	0	0	0	0	V			480	0	0	0	0	0	0	0	0	V		480									V			480									V
481	0.020202	0.0505051	0.0505051	0.0808081	0.10101	0.181818	0.272727	0.242424	D			481	0.0209013	0.0489905	0.0386066	0.106274	0.11898	0.134458	0.210489	0.321302	D		481	-0.00069926	0.0015146	0.0118984	-0.0254656	-0.0179696	0.04736	0.0622387	-0.0788774	D			481	-0.00069926	0.0015146	0.0118984	-0.0254656	-0.0179696	0.04736	0.0622387	-0.0788774	D
482	0.0199336	0.0531561	0.0598007	0.089701	0.106312	0.179402	0.252492	0.239203	R			482	0.021223	0.0578208	0.0449944	0.0976999	0.115424	0.148171	0.205388	0.309279	R		482	-0.00128947	-0.00466462	0.0148063	-0.00799889	-0.00911125	0.0312309	0.0471037	-0.0700766	R			482	-0.00128947	-0.00466462	0.0148063	-0.00799889	-0.00911125	0.0312309	0.0471037	-0.0700766	R
483	0.0199336	0.0531561	0.0598007	0.089701	0.106312	0.179402	0.252492	0.239203	T			483	0.021223	0.0578208	0.0449944	0.0976999	0.115424	0.148171	0.205388	0.309279	T		483	-0.00128947	-0.00466462	0.0148063	-0.00799889	-0.00911125	0.0312309	0.0471037	-0.0700766	T			483	-0.00128947	-0.00466462	0.0148063	-0.00799889	-0.00911125	0.0312309	0.0471037	-0.0700766	T
484	0.0199336	0.0531561	0.0598007	0.089701	0.106312	0.179402	0.252492	0.239203	A			484	0.021223	0.0578208	0.0449944	0.0976999	0.115424	0.148171	0.205388	0.309279	A		484	-0.00128947	-0.00466462	0.0148063	-0.00799889	-0.00911125	0.0312309	0.0471037	-0.0700766	A			484	-0.00128947	-0.00466462	0.0148063	-0.00799889	-0.00911125	0.0312309	0.0471037	-0.0700766	A
485	0.0199336	0.0531561	0.0598007	0.089701	0.106312	0.179402	0.252492	0.239203	G			485	0.021223	0.0578208	0.0449944	0.0976999	0.115424	0.148171	0.205388	0.309279	G		485	-0.00128947	-0.00466462	0.0148063	-0.00799889	-0.00911125	0.0312309	0.0471037	-0.0700766	G			485	-0.00128947	-0.00466462	0.0148063	-0.00799889	-0.00911125	0.0312309	0.0471037	-0.0700766	G
486	0.0239521	0.0499002	0.0518962	0.0738523	0.0958084	0.179641	0.245509	0.279441	W			486	0.0197613	0.054281	0.0396563	0.0871705	0.106229	0.148167	0.21388	0.330854	W		486	0.00419084	-0.00438078	0.0122399	-0.0133182	-0.0104211	0.0314733	0.0316285	-0.0514125	W			486	0.00419084	-0.00438078	0.0122399	-0.0133182	-0.0104211	0.0314733	0.0316285	-0.0514125	W
487	0.0239521	0.0499002	0.0518962	0.0738523	0.0958084	0.179641	0.245509	0.279441	N			487	0.0197613	0.054281	0.0396563	0.0871705	0.106229	0.148167	0.21388	0.330854	N		487	0.00419084	-0.00438078	0.0122399	-0.0133182	-0.0104211	0.0314733	0.0316285	-0.0514125	N			487	0.00419084	-0.00438078	0.0122399	-0.0133182	-0.0104211	0.0314733	0.0316285	-0.0514125	N
488	0.0239521	0.0499002	0.0518962	0.0738523	0.0958084	0.179641	0.245509	0.279441	I			488	0.0197613	0.054281	0.0396563	0.0871705	0.106229	0.148167	0.21388	0.330854	I		488	0.00419084	-0.00438078	0.0122399	-0.0133182	-0.0104211	0.0314733	0.0316285	-0.0514125	I			488	0.00419084	-0.00438078	0.0122399	-0.0133182	-0.0104211	0.0314733	0.0316285	-0.0514125	I
489	0.0239521	0.0499002	0.0518962	0.0738523	0.0958084	0.179641	0.245509	0.279441	P			489	0.0197613	0.054281	0.0396563	0.0871705	0.106229	0.148167	0.21388	0.330854	P		489	0.00419084	-0.00438078	0.0122399	-0.0133182	-0.0104211	0.0314733	0.0316285	-0.0514125	P			489	0.00419084	-0.00438078	0.0122399	-0.0133182	-0.0104211	0.0314733	0.0316285	-0.0514125	P
490	0.0239521	0.0499002	0.0518962	0.0738523	0.0958084	0.179641	0.245509	0.279441	M			490	0.0197613	0.054281	0.0396563	0.0871705	0.106229	0.148167	0.21388	0.330854	M		490	0.00419084	-0.00438078	0.0122399	-0.0133182	-0.0104211	0.0314733	0.0316285	-0.0514125	M			490	0.00419084	-0.00438078	0.0122399	-0.0133182	-0.0104211	0.0314733	0.0316285	-0.0514125	M
491	0.0239521	0.0499002	0.0518962	0.0738523	0.0958084	0.179641	0.245509	0.279441	G			491	0.0197613	0.054281	0.0396563	0.0871705	0.106229	0.148167	0.21388	0.330854	G		491	0.00419084	-0.00438078	0.0122399	-0.0133182	-0.0104211	0.0314733	0.0316285	-0.0514125	G			491	0.00419084	-0.00438078	0.0122399	-0.0133182	-0.0104211	0.0314733	0.0316285	-0.0514125	G
492	0.0239521	0.0499002	0.0518962	0.0738523	0.0958084	0.179641	0.245509	0.279441	L			492	0.0197613	0.054281	0.0396563	0.0871705	0.106229	0.148167	0.21388	0.330854	L		492	0.00419084	-0.00438078	0.0122399	-0.0133182	-0.0104211	0.0314733	0.0316285	-0.0514125	L			492	0.00419084	-0.00438078	0.0122399	-0.0133182	-0.0104211	0.0314733	0.0316285	-0.0514125	L
493	0	0	0	0	0	0	0	0	I			493	0	0	0	0	0	0	0	0	I		493									I			493									I
494	0	0	0	0	0	0	0	0	V			494	0	0	0	0	0	0	0	0	V		494									V			494									V
495	0	0	0	0	0	0	0	0	N			495	0	0	0	0	0	0	0	0	N		495									N			495									N
496	0	0	0	0	0	0	0	0	Q			496	0	0	0	0	0	0	0	0	Q		496									Q			496									Q
497	0	0	0	0	0	0	0	0	T			497	0	0	0	0	0	0	0	0	T		497									T			497									T
498	0	0	0	0	0	0	0	0	G			498	0	0	0	0	0	0	0	0	G		498									G			498									G
499	0	0	0	0	0	0	0	0	S			499	0	0	0	0	0	0	0	0	S		499									S			499									S
500	0	0	0	0	0	0	0	0	C			500	0	0	0	0	0	0	0	0	C		500									C			500									C
501	0	0	0	0	0	0	0	0	A			501	0	0	0	0	0	0	0	0	A		501									A			501									A
502	0	0	0	0	0	0	0	0	F			502	0	0	0	0	0	0	0	0	F		502									F			502									F
503	0	0	0	0	0	0	0	0	D			503	0	0	0	0	0	0	0	0	D		503									D			503									D
504	0	0	0	0	0	0	0	0	E			504	0	0	0	0	0	0	0	0	E		504									E			504									E
505	0	0	0	0	0	0	0	0	F			505	0	0	0	0	0	0	0	0	F		505									F			505									F
506	0	0	0	0	0	0	0	0	F			506	0	0	0	0	0	0	0	0	F		506									F			506									F
507	0	0	0	0	0	0	0	0	S			507	0	0	0	0	0	0	0	0	S		507									S			507									S
508	0	0	0	0	0	0	0	0	Q			508	0	0	0	0	0	0	0	0	Q		508									Q			508									Q
509	0	0	0	0	0	0	0	0	S			509	0	0	0	0	0	0	0	0	S		509									S			509									S
510	0	0	0	0	0	0	0	0	C			510	0	0	0	0	0	0	0	0	C		510									C			510									C
511	0	0	0	0	0	0	0	0	A			511	0	0	0	0	0	0	0	0	A		511									A			511									A
512	0	0	0	0	0	0	0	0	P			512	0	0	0	0	0	0	0	0	P		512									P			512									P
513	0	0	0	0	0	0	0	0	G			513	0	0	0	0	0	0	0	0	G		513									G			513									G
514	0	0	0	0	0	0	0	0	A			514	0	0	0	0	0	0	0	0	A		514									A			514									A
515	0	0	0	0	0	0	0	0	D			515	0	0	0	0	0	0	0	0	D		515									D			515									D
516	0	0	0	0	0	0	0	0	P			516	0	0	0	0	0	0	0	0	P		516									P			516									P
517	0	0	0	0	0	0	0	0	K			517	0	0	0	0	0	0	0	0	K		517									K			517									K
518	0	0	0	0	0	0	0	0	S			518	0	0	0	0	0	0	0	0	S		518									S			518									S
519	0	0	0	0	0	0	0	0	R			519	0	0	0	0	0	0	0	0	R		519									R			519									R
520	0	0	0	0	0	0	0	0	L			520	0	0	0	0	0	0	0	0	L		520									L			520									L
521	0	0	0	0	0	0	0	0	C			521	0	0	0	0	0	0	0	0	C		521									C			521									C
522	0	0	0	0	0	0	0	0	A			522	0	0	0	0	0	0	0	0	A		522									A			522									A
523	0	0	0	0	0	0	0	0	L			523	0	0	0	0	0	0	0	0	L		523									L			523									L
524	0	0	0	0	0	0	0	0	C			524	0	0	0	0	0	0	0	0	C		524									C			524									C
525	0	0	0	0	0	0	0	0	A			525	0	0	0	0	0	0	0	0	A		525									A			525									A
526	0	0	0	0	0	0	0	0	G			526	0	0	0	0	0	0	0	0	G		526									G			526									G
527	0	0	0	0	0	0	0	0	D			527	0	0	0	0	0	0	0	0	D		527									D			527									D
528	0	0	0	0	0	0	0	0	D			528	0	0	0	0	0	0	0	0	D		528									D			528									D
529	0	0	0	0	0	0	0	0	Q			529	0	0	0	0	0	0	0	0	Q		529									Q			529									Q
530	0	0	0	0	0	0	0	0	G			530	0	0	0	0	0	0	0	0	G		530									G			530									G
531	0	0	0	0	0	0	0	0	L			531	0	0	0	0	0	0	0	0	L		531									L			531									L
532	0	0	0	0	0	0	0	0	D			532	0	0	0	0	0	0	0	0	D		532									D			532									D
533	0	0	0	0	0	0	0	0	K			533	0	0	0	0	0	0	0	0	K		533									K			533									K
534	0	0	0	0	0	0	0	0	C			534	0	0	0	0	0	0	0	0	C		534									C			534									C
535	0	0	0	0	0	0	0	0	V			535	0	0	0	0	0	0	0	0	V		535									V			535									V
536	0	0	0	0	0	0	0	0	P			536	0	0	0	0	0	0	0	0	P		536									P			536									P
537	0	0	0	0	0	0	0	0	N			537	0	0	0	0	0	0	0	0	N		537									N			537									N
538	0	0	0	0	0	0	0	0	S			538	0	0	0	0	0	0	0	0	S		538									S			538									S
539	0	0	0	0	0	0	0	0	K			539	0	0	0	0	0	0	0	0	K		539									K			539									K
540	0	0	0	0	0	0	0	0	E			540	0	0	0	0	0	0	0	0	E		540									E			540									E
541	0.030303	0.030303	0.030303	0.0505051	0.0808081	0.171717	0.212121	0.393939	K			541	0.00990495	0.0544471	0.0145928	0.0496101	0.0832145	0.113099	0.158577	0.516555	K		541	0.0203981	-0.0241441	0.0157102	0.000894909	-0.0024064	0.0586181	0.0535444	-0.122615	K			541	0.0203981	-0.0241441	0.0157102	0.000894909	-0.0024064	0.0586181	0.0535444	-0.122615	K
542	0.030303	0.030303	0.030303	0.0505051	0.0808081	0.171717	0.212121	0.393939	Y			542	0.00990495	0.0544471	0.0145928	0.0496101	0.0832145	0.113099	0.158577	0.516555	Y		542	0.0203981	-0.0241441	0.0157102	0.000894909	-0.0024064	0.0586181	0.0535444	-0.122615	Y			542	0.0203981	-0.0241441	0.0157102	0.000894909	-0.0024064	0.0586181	0.0535444	-0.122615	Y
543	0.030303	0.030303	0.030303	0.0505051	0.0808081	0.171717	0.212121	0.393939	Y			543	0.00990495	0.0544471	0.0145928	0.0496101	0.0832145	0.113099	0.158577	0.516555	Y		543	0.0203981	-0.0241441	0.0157102	0.000894909	-0.0024064	0.0586181	0.0535444	-0.122615	Y			543	0.0203981	-0.0241441	0.0157102	0.000894909	-0.0024064	0.0586181	0.0535444	-0.122615	Y
544	0.030303	0.030303	0.030303	0.0505051	0.0808081	0.171717	0.212121	0.393939	G			544	0.00990495	0.0544471	0.0145928	0.0496101	0.0832145	0.113099	0.158577	0.516555	G		544	0.0203981	-0.0241441	0.0157102	0.000894909	-0.0024064	0.0586181	0.0535444	-0.122615	G			544	0.0203981	-0.0241441	0.0157102	0.000894909	-0.0024064	0.0586181	0.0535444	-0.122615	G
545	0.030303	0.030303	0.030303	0.0505051	0.0808081	0.171717	0.212121	0.393939	Y			545	0.00990495	0.0544471	0.0145928	0.0496101	0.0832145	0.113099	0.158577	0.516555	Y		545	0.0203981	-0.0241441	0.0157102	0.000894909	-0.0024064	0.0586181	0.0535444	-0.122615	Y			545	0.0203981	-0.0241441	0.0157102	0.000894909	-0.0024064	0.0586181	0.0535444	-0.122615	Y
546	0.030303	0.030303	0.030303	0.0505051	0.0808081	0.171717	0.212121	0.393939	T			546	0.00990495	0.0544471	0.0145928	0.0496101	0.0832145	0.113099	0.158577	0.516555	T		546	0.0203981	-0.0241441	0.0157102	0.000894909	-0.0024064	0.0586181	0.0535444	-0.122615	T			546	0.0203981	-0.0241441	0.0157102	0.000894909	-0.0024064	0.0586181	0.0535444	-0.122615	T
547	0.030303	0.030303	0.030303	0.0505051	0.0808081	0.171717	0.212121	0.393939	G			547	0.00990495	0.0544471	0.0145928	0.0496101	0.0832145	0.113099	0.158577	0.516555	G		547	0.0203981	-0.0241441	0.0157102	0.000894909	-0.0024064	0.0586181	0.0535444	-0.122615	G			547	0.0203981	-0.0241441	0.0157102	0.000894909	-0.0024064	0.0586181	0.0535444	-0.122615	G
548	0.030303	0.030303	0.030303	0.0505051	0.0808081	0.171717	0.212121	0.393939	A			548	0.00990495	0.0544471	0.0145928	0.0496101	0.0832145	0.113099	0.158577	0.516555	A		548	0.0203981	-0.0241441	0.0157102	0.000894909	-0.0024064	0.0586181	0.0535444	-0.122615	A			548	0.0203981	-0.0241441	0.0157102	0.000894909	-0.0024064	0.0586181	0.0535444	-0.122615	A
549	0	0	0	0	0	0	0	0	F			549	0	0	0	0	0	0	0	0	F		549									F			549									F
550	0	0	0	0	0	0	0	0	R			550	0	0	0	0	0	0	0	0	R		550									R			550									R
551	0	0	0	0	0	0	0	0	C			551	0	0	0	0	0	0	0	0	C		551									C			551									C
552	0	0	0	0	0	0	0	0	L			552	0	0	0	0	0	0	0	0	L		552									L			552									L
553	0	0	0	0	0	0	0	0	A			553	0	0	0	0	0	0	0	0	A		553									A			553									A
554	0	0	0	0	0	0	0	0	E			554	0	0	0	0	0	0	0	0	E		554									E			554									E
555	0	0	0	0	0	0	0	0	D			555	0	0	0	0	0	0	0	0	D		555									D			555									D
556	0	0	0	0	0	0	0	0	V			556	0	0	0	0	0	0	0	0	V		556									V			556									V
557	0	0	0	0	0	0	0	0	G			557	0	0	0	0	0	0	0	0	G		557									G			557									G
558	0	0	0	0	0	0	0	0	D			558	0	0	0	0	0	0	0	0	D		558									D			558									D
559	0	0	0	0	0	0	0	0	V			559	0	0	0	0	0	0	0	0	V		559									V			559									V
560	0	0	0	0	0	0	0	0	A			560	0	0	0	0	0	0	0	0	A		560									A			560									A
561	0	0	0	0	0	0	0	0	F			561	0	0	0	0	0	0	0	0	F		561									F			561									F
562	0	0	0	0	0	0	0	0	V			562	0	0	0	0	0	0	0	0	V		562									V			562									V
563	0	0	0	0	0	0	0	0	K			563	0	0	0	0	0	0	0	0	K		563									K			563									K
564	0	0	0	0	0	0	0	0	N			564	0	0	0	0	0	0	0	0	N		564									N			564									N
565	0	0	0	0	0	0	0	0	D			565	0	0	0	0	0	0	0	0	D		565									D			565									D
566	0	0	0	0	0	0	0	0	T			566	0	0	0	0	0	0	0	0	T		566									T			566									T
567	0	0	0	0	0	0	0	0	V			567	0	0	0	0	0	0	0	0	V		567									V			567									V
568	0	0	0	0	0	0	0	0	W			568	0	0	0	0	0	0	0	0	W		568									W			568									W
569	0	0	0	0	0	0	0	0	E			569	0	0	0	0	0	0	0	0	E		569									E			569									E
570	0	0	0	0	0	0	0	0	N			570	0	0	0	0	0	0	0	0	N		570									N			570									N
571	0	0	0	0	0	0	0	0	T			571	0	0	0	0	0	0	0	0	T		571									T			571									T
572	0	0	0	0	0	0	0	0	N			572	0	0	0	0	0	0	0	0	N		572									N			572									N
573	0	0	0	0	0	0	0	0	G			573	0	0	0	0	0	0	0	0	G		573									G			573									G
574	0	0	0	0	0	0	0	0	E			574	0	0	0	0	0	0	0	0	E		574									E			574									E
575	0	0	0	0	0	0	0	0	S			575	0	0	0	0	0	0	0	0	S		575									S			575									S
576	0	0	0	0	0	0	0	0	T			576	0	0	0	0	0	0	0	0	T		576									T			576									T
577	0	0	0	0	0	0	0	0	A			577	0	0	0	0	0	0	0	0	A		577									A			577									A
578	0	0	0	0	0	0	0	0	D			578	0	0	0	0	0	0	0	0	D		578									D			578									D
579	0.0166113	0.0299003	0.0631229	0.13289	0.169435	0.20598	0.222591	0.159468	W			579	0.0131752	0.0367461	0.0405681	0.145764	0.173516	0.177278	0.192009	0.220944	W		579	0.00343614	-0.00684575	0.0225548	-0.0128738	-0.0040804	0.0287019	0.0305823	-0.0614752	W			579	0.00343614	-0.00684575	0.0225548	-0.0128738	-0.0040804	0.0287019	0.0305823	-0.0614752	W
580	0.0166113	0.0299003	0.0631229	0.13289	0.169435	0.20598	0.222591	0.159468	A			580	0.0131752	0.0367461	0.0405681	0.145764	0.173516	0.177278	0.192009	0.220944	A		580	0.00343614	-0.00684575	0.0225548	-0.0128738	-0.0040804	0.0287019	0.0305823	-0.0614752	A			580	0.00343614	-0.00684575	0.0225548	-0.0128738	-0.0040804	0.0287019	0.0305823	-0.0614752	A
581	0.0166113	0.0299003	0.0631229	0.13289	0.169435	0.20598	0.222591	0.159468	K			581	0.0131752	0.0367461	0.0405681	0.145764	0.173516	0.177278	0.192009	0.220944	K		581	0.00343614	-0.00684575	0.0225548	-0.0128738	-0.0040804	0.0287019	0.0305823	-0.0614752	K			581	0.00343614	-0.00684575	0.0225548	-0.0128738	-0.0040804	0.0287019	0.0305823	-0.0614752	K
582	0.0166113	0.0299003	0.0631229	0.13289	0.169435	0.20598	0.222591	0.159468	N			582	0.0131752	0.0367461	0.0405681	0.145764	0.173516	0.177278	0.192009	0.220944	N		582	0.00343614	-0.00684575	0.0225548	-0.0128738	-0.0040804	0.0287019	0.0305823	-0.0614752	N			582	0.00343614	-0.00684575	0.0225548	-0.0128738	-0.0040804	0.0287019	0.0305823	-0.0614752	N
583	0.0166113	0.0299003	0.0631229	0.13289	0.169435	0.20598	0.222591	0.159468	L			583	0.0131752	0.0367461	0.0405681	0.145764	0.173516	0.177278	0.192009	0.220944	L		583	0.00343614	-0.00684575	0.0225548	-0.0128738	-0.0040804	0.0287019	0.0305823	-0.0614752	L			583	0.00343614	-0.00684575	0.0225548	-0.0128738	-0.0040804	0.0287019	0.0305823	-0.0614752	L
584	0.0249377	0.0374065	0.0723192	0.13217	0.159601	0.194514	0.219451	0.159601	N			584	0.0199136	0.0443527	0.0510228	0.145505	0.162208	0.172228	0.191484	0.213286	N		584	0.00502403	-0.00694618	0.0212964	-0.0133356	-0.00260657	0.022286	0.0279669	-0.0536849	N			584	0.00502403	-0.00694618	0.0212964	-0.0133356	-0.00260657	0.022286	0.0279669	-0.0536849	N
585	0.0249377	0.0374065	0.0723192	0.13217	0.159601	0.194514	0.219451	0.159601	R			585	0.0199136	0.0443527	0.0510228	0.145505	0.162208	0.172228	0.191484	0.213286	R		585	0.00502403	-0.00694618	0.0212964	-0.0133356	-0.00260657	0.022286	0.0279669	-0.0536849	R			585	0.00502403	-0.00694618	0.0212964	-0.0133356	-0.00260657	0.022286	0.0279669	-0.0536849	R
586	0.0249377	0.0374065	0.0723192	0.13217	0.159601	0.194514	0.219451	0.159601	E			586	0.0199136	0.0443527	0.0510228	0.145505	0.162208	0.172228	0.191484	0.213286	E		586	0.00502403	-0.00694618	0.0212964	-0.0133356	-0.00260657	0.022286	0.0279669	-0.0536849	E			586	0.00502403	-0.00694618	0.0212964	-0.0133356	-0.00260657	0.022286	0.0279669	-0.0536849	E
587	0.0249377	0.0374065	0.0723192	0.13217	0.159601	0.194514	0.219451	0.159601	D			587	0.0199136	0.0443527	0.0510228	0.145505	0.162208	0.172228	0.191484	0.213286	D		587	0.00502403	-0.00694618	0.0212964	-0.0133356	-0.00260657	0.022286	0.0279669	-0.0536849	D			587	0.00502403	-0.00694618	0.0212964	-0.0133356	-0.00260657	0.022286	0.0279669	-0.0536849	D
588	0.0267559	0.0367893	0.0735786	0.137124	0.160535	0.200669	0.227425	0.137124	F			588	0.0218468	0.045207	0.057779	0.152978	0.159817	0.180208	0.201093	0.181071	F		588	0.00490903	-0.00841774	0.0157996	-0.0158547	0.000718526	0.0204607	0.0263316	-0.0439471	F			588	0.00490903	-0.00841774	0.0157996	-0.0158547	0.000718526	0.0204607	0.0263316	-0.0439471	F
589	0.03	0.045	0.08	0.135	0.155	0.19	0.225	0.14	R			589	0.0264434	0.0494288	0.0654463	0.15355	0.149911	0.17771	0.199306	0.178205	R		589	0.00355659	-0.00442878	0.0145537	-0.0185499	0.00508882	0.0122903	0.0256941	-0.0382047	R			589	0.00355659	-0.00442878	0.0145537	-0.0185499	0.00508882	0.0122903	0.0256941	-0.0382047	R
590	0.03	0.045	0.08	0.135	0.155	0.19	0.225	0.14	L			590	0.0264434	0.0494288	0.0654463	0.15355	0.149911	0.17771	0.199306	0.178205	L		590	0.00355659	-0.00442878	0.0145537	-0.0185499	0.00508882	0.0122903	0.0256941	-0.0382047	L			590	0.00355659	-0.00442878	0.0145537	-0.0185499	0.00508882	0.0122903	0.0256941	-0.0382047	L
591	0	0	0	0	0	0	0	0	L			591	0	0	0	0	0	0	0	0	L		591									L			591									L
592	0	0	0	0	0	0	0	0	C			592	0	0	0	0	0	0	0	0	C		592									C			592									C
593	0	0	0	0	0	0	0	0	L			593	0	0	0	0	0	0	0	0	L		593									L			593									L
594	0	0	0	0	0	0	0	0	D			594	0	0	0	0	0	0	0	0	D		594									D			594									D
595	0	0	0	0	0	0	0	0	G			595	0	0	0	0	0	0	0	0	G		595									G			595									G
596	0	0	0	0	0	0	0	0	T			596	0	0	0	0	0	0	0	0	T		596									T			596									T
597	0	0	0	0	0	0	0	0	R			597	0	0	0	0	0	0	0	0	R		597									R			597									R
598	0	0	0	0	0	0	0	0	K			598	0	0	0	0	0	0	0	0	K		598									K			598									K
599	0	0	0	0	0	0	0	0	P			599	0	0	0	0	0	0	0	0	P		599									P			599									P
600	0	0	0	0	0	0	0	0	V			600	0	0	0	0	0	0	0	0	V		600									V			600									V
601	0	0	0	0	0	0	0	0	T			601	0	0	0	0	0	0	0	0	T		601									T			601									T
602	0	0	0	0	0	0	0	0	E			602	0	0	0	0	0	0	0	0	E		602									E			602									E
603	0	0	0	0	0	0	0	0	A			603	0	0	0	0	0	0	0	0	A		603									A			603									A
604	0	0	0	0	0	0	0	0	Q			604	0	0	0	0	0	0	0	0	Q		604									Q			604									Q
605	0	0	0	0	0	0	0	0	S			605	0	0	0	0	0	0	0	0	S		605									S			605									S
606	0	0	0	0	0	0	0	0	C			606	0	0	0	0	0	0	0	0	C		606									C			606									C
607	0	0	0	0	0	0	0	0	H			607	0	0	0	0	0	0	0	0	H		607									H			607									H
608	0	0	0	0	0	0	0	0	L			608	0	0	0	0	0	0	0	0	L		608									L			608									L
609	0	0	0	0	0	0	0	0	A			609	0	0	0	0	0	0	0	0	A		609									A			609									A
610	0	0	0	0	0	0	0	0	V			610	0	0	0	0	0	0	0	0	V		610									V			610									V
611	0	0	0	0	0	0	0	0	A			611	0	0	0	0	0	0	0	0	A		611									A			611									A
612	0	0	0	0	0	0	0	0	P			612	0	0	0	0	0	0	0	0	P		612									P			612									P
613	0	0	0	0	0	0	0	0	N			613	0	0	0	0	0	0	0	0	N		613									N			613									N
614	0	0	0	0	0	0	0	0	H			614	0	0	0	0	0	0	0	0	H		614									H			614									H
615	0	0	0	0	0	0	0	0	A			615	0	0	0	0	0	0	0	0	A		615									A			615									A
616	0	0	0	0	0	0	0	0	V			616	0	0	0	0	0	0	0	0	V		616									V			616									V
617	0	0	0	0	0	0	0	0	V			617	0	0	0	0	0	0	0	0	V		617									V			617									V
618	0	0	0	0	0	0	0	0	S			618	0	0	0	0	0	0	0	0	S		618									S			618									S
619	0	0	0	0	0	0	0	0	R			619	0	0	0	0	0	0	0	0	R		619									R			619									R
620	0	0	0	0	0	0	0	0	S			620	0	0	0	0	0	0	0	0	S		620									S			620									S
621	0	0	0	0	0	0	0	0	D			621	0	0	0	0	0	0	0	0	D		621									D			621									D
622	0	0	0	0	0	0	0	0	R			622	0	0	0	0	0	0	0	0	R		622									R			622									R
623	0	0	0	0	0	0	0	0	A			623	0	0	0	0	0	0	0	0	A		623									A			623									A
624	0	0	0	0	0	0	0	0	A			624	0	0	0	0	0	0	0	0	A		624									A			624									A
625	0	0	0	0	0	0	0	0	H			625	0	0	0	0	0	0	0	0	H		625									H			625									H
626	0	0	0	0	0	0	0	0	V			626	0	0	0	0	0	0	0	0	V		626									V			626									V
627	0	0	0	0	0	0	0	0	K			627	0	0	0	0	0	0	0	0	K		627									K			627									K
628	0	0	0	0	0	0	0	0	Q			628	0	0	0	0	0	0	0	0	Q		628									Q			628									Q
629	0.02	0.04	0.06	0.1	0.14	0.23	0.24	0.17	V			629	0.0168297	0.0520215	0.0414391	0.101464	0.150216	0.213327	0.203361	0.221341	V		629	0.00317028	-0.0120215	0.0185609	-0.00146437	-0.0102158	0.0166725	0.0366389	-0.0513409	V			629	0.00317028	-0.0120215	0.0185609	-0.00146437	-0.0102158	0.0166725	0.0366389	-0.0513409	V
630	0.02	0.04	0.06	0.1	0.14	0.23	0.24	0.17	L			630	0.0168297	0.0520215	0.0414391	0.101464	0.150216	0.213327	0.203361	0.221341	L		630	0.00317028	-0.0120215	0.0185609	-0.00146437	-0.0102158	0.0166725	0.0366389	-0.0513409	L			630	0.00317028	-0.0120215	0.0185609	-0.00146437	-0.0102158	0.0166725	0.0366389	-0.0513409	L
631	0.02	0.04	0.06	0.1	0.14	0.23	0.24	0.17	L			631	0.0168297	0.0520215	0.0414391	0.101464	0.150216	0.213327	0.203361	0.221341	L		631	0.00317028	-0.0120215	0.0185609	-0.00146437	-0.0102158	0.0166725	0.0366389	-0.0513409	L			631	0.00317028	-0.0120215	0.0185609	-0.00146437	-0.0102158	0.0166725	0.0366389	-0.0513409	L
632	0.02	0.04	0.06	0.1	0.14	0.23	0.24	0.17	H			632	0.0168297	0.0520215	0.0414391	0.101464	0.150216	0.213327	0.203361	0.221341	H		632	0.00317028	-0.0120215	0.0185609	-0.00146437	-0.0102158	0.0166725	0.0366389	-0.0513409	H			632	0.00317028	-0.0120215	0.0185609	-0.00146437	-0.0102158	0.0166725	0.0366389	-0.0513409	H
633	0.02	0.04	0.06	0.1	0.14	0.23	0.24	0.17	Q			633	0.0168297	0.0520215	0.0414391	0.101464	0.150216	0.213327	0.203361	0.221341	Q		633	0.00317028	-0.0120215	0.0185609	-0.00146437	-0.0102158	0.0166725	0.0366389	-0.0513409	Q			633	0.00317028	-0.0120215	0.0185609	-0.00146437	-0.0102158	0.0166725	0.0366389	-0.0513409	Q
634	0.02	0.04	0.06	0.1	0.14	0.23	0.24	0.17	Q			634	0.0168297	0.0520215	0.0414391	0.101464	0.150216	0.213327	0.203361	0.221341	Q		634	0.00317028	-0.0120215	0.0185609	-0.00146437	-0.0102158	0.0166725	0.0366389	-0.0513409	Q			634	0.00317028	-0.0120215	0.0185609	-0.00146437	-0.0102158	0.0166725	0.0366389	-0.0513409	Q
635	0.02	0.04	0.06	0.1	0.14	0.23	0.24	0.17	A			635	0.0168297	0.0520215	0.0414391	0.101464	0.150216	0.213327	0.203361	0.221341	A		635	0.00317028	-0.0120215	0.0185609	-0.00146437	-0.0102158	0.0166725	0.0366389	-0.0513409	A			635	0.00317028	-0.0120215	0.0185609	-0.00146437	-0.0102158	0.0166725	0.0366389	-0.0513409	A
636	0.02	0.04	0.06	0.1	0.14	0.23	0.24	0.17	L			636	0.0168297	0.0520215	0.0414391	0.101464	0.150216	0.213327	0.203361	0.221341	L		636	0.00317028	-0.0120215	0.0185609	-0.00146437	-0.0102158	0.0166725	0.0366389	-0.0513409	L			636	0.00317028	-0.0120215	0.0185609	-0.00146437	-0.0102158	0.0166725	0.0366389	-0.0513409	L
637	0	0	0	0	0	0	0	0	F			637	0	0	0	0	0	0	0	0	F		637									F			637									F
638	0	0	0	0	0	0	0	0	G			638	0	0	0	0	0	0	0	0	G		638									G			638									G
639	0	0	0	0	0	0	0	0	K			639	0	0	0	0	0	0	0	0	K		639									K			639									K
640	0	0	0	0	0	0	0	0	N			640	0	0	0	0	0	0	0	0	N		640									N			640									N
641	0	0	0	0	0	0	0	0	G			641	0	0	0	0	0	0	0	0	G		641									G			641									G
642	0	0	0	0	0	0	0	0	K			642	0	0	0	0	0	0	0	0	K		642									K			642									K
643	0	0	0	0	0	0	0	0	N			643	0	0	0	0	0	0	0	0	N		643									N			643									N
644	0	0	0	0	0	0	0	0	C			644	0	0	0	0	0	0	0	0	C		644									C			644									C
645	0	0	0	0	0	0	0	0	P			645	0	0	0	0	0	0	0	0	P		645									P			645									P
646	0	0	0	0	0	0	0	0	D			646	0	0	0	0	0	0	0	0	D		646									D			646									D
647	0	0	0	0	0	0	0	0	K			647	0	0	0	0	0	0	0	0	K		647									K			647									K
648	0	0	0	0	0	0	0	0	F			648	0	0	0	0	0	0	0	0	F		648									F			648									F
649	0	0	0	0	0	0	0	0	C			649	0	0	0	0	0	0	0	0	C		649									C			649									C
650	0	0	0	0	0	0	0	0	L			650	0	0	0	0	0	0	0	0	L		650									L			650									L
651	0.01	0.03	0.04	0.09	0.14	0.25	0.27	0.17	F			651	0.010223	0.0325571	0.0273666	0.0956784	0.129015	0.212315	0.241947	0.250898	F		651	-0.000222966	-0.00255711	0.0126334	-0.00567843	0.0109855	0.0376852	0.0280528	-0.0808984	F			651	-0.000222966	-0.00255711	0.0126334	-0.00567843	0.0109855	0.0376852	0.0280528	-0.0808984	F
652	0.015	0.03	0.045	0.095	0.15	0.225	0.245	0.195	K			652	0.0104467	0.0351447	0.0255868	0.094984	0.145386	0.201019	0.206352	0.281082	K		652	0.00455334	-0.00514475	0.0194132	1.60396e-05	0.00461421	0.0239815	0.038648	-0.0860816	K			652	0.00455334	-0.00514475	0.0194132	1.60396e-05	0.00461421	0.0239815	0.038648	-0.0860816	K
653	0.015	0.03	0.045	0.095	0.15	0.225	0.245	0.195	S			653	0.0104467	0.0351447	0.0255868	0.094984	0.145386	0.201019	0.206352	0.281082	S		653	0.00455334	-0.00514475	0.0194132	1.60396e-05	0.00461421	0.0239815	0.038648	-0.0860816	S			653	0.00455334	-0.00514475	0.0194132	1.60396e-05	0.00461421	0.0239815	0.038648	-0.0860816	S
654	0.015	0.03	0.045	0.095	0.15	0.225	0.245	0.195	E			654	0.0104467	0.0351447	0.0255868	0.094984	0.145386	0.201019	0.206352	0.281082	E		654	0.00455334	-0.00514475	0.0194132	1.60396e-05	0.00461421	0.0239815	0.038648	-0.0860816	E			654	0.00455334	-0.00514475	0.0194132	1.60396e-05	0.00461421	0.0239815	0.038648	-0.0860816	E
655	0.015	0.03	0.045	0.095	0.15	0.225	0.245	0.195	T			655	0.0104467	0.0351447	0.0255868	0.094984	0.145386	0.201019	0.206352	0.281082	T		655	0.00455334	-0.00514475	0.0194132	1.60396e-05	0.00461421	0.0239815	0.038648	-0.0860816	T			655	0.00455334	-0.00514475	0.0194132	1.60396e-05	0.00461421	0.0239815	0.038648	-0.0860816	T
656	0.015	0.03	0.045	0.095	0.15	0.225	0.245	0.195	K			656	0.0104467	0.0351447	0.0255868	0.094984	0.145386	0.201019	0.206352	0.281082	K		656	0.00455334	-0.00514475	0.0194132	1.60396e-05	0.00461421	0.0239815	0.038648	-0.0860816	K			656	0.00455334	-0.00514475	0.0194132	1.60396e-05	0.00461421	0.0239815	0.038648	-0.0860816	K
657	0.015	0.03	0.045	0.095	0.15	0.225	0.245	0.195	N			657	0.0104467	0.0351447	0.0255868	0.094984	0.145386	0.201019	0.206352	0.281082	N		657	0.00455334	-0.00514475	0.0194132	1.60396e-05	0.00461421	0.0239815	0.038648	-0.0860816	N			657	0.00455334	-0.00514475	0.0194132	1.60396e-05	0.00461421	0.0239815	0.038648	-0.0860816	N
658	0.015	0.03	0.045	0.095	0.15	0.225	0.245	0.195	L			658	0.0104467	0.0351447	0.0255868	0.094984	0.145386	0.201019	0.206352	0.281082	L		658	0.00455334	-0.00514475	0.0194132	1.60396e-05	0.00461421	0.0239815	0.038648	-0.0860816	L			658	0.00455334	-0.00514475	0.0194132	1.60396e-05	0.00461421	0.0239815	0.038648	-0.0860816	L
659	0.015	0.03	0.045	0.095	0.15	0.225	0.245	0.195	L			659	0.0104467	0.0351447	0.0255868	0.094984	0.145386	0.201019	0.206352	0.281082	L		659	0.00455334	-0.00514475	0.0194132	1.60396e-05	0.00461421	0.0239815	0.038648	-0.0860816	L			659	0.00455334	-0.00514475	0.0194132	1.60396e-05	0.00461421	0.0239815	0.038648	-0.0860816	L
660	0	0	0	0	0	0	0	0	F			660	0	0	0	0	0	0	0	0	F		660									F			660									F
661	0	0	0	0	0	0	0	0	N			661	0	0	0	0	0	0	0	0	N		661									N			661									N
662	0	0	0	0	0	0	0	0	D			662	0	0	0	0	0	0	0	0	D		662									D			662									D
663	0	0	0	0	0	0	0	0	N			663	0	0	0	0	0	0	0	0	N		663									N			663									N
664	0	0	0	0	0	0	0	0	T			664	0	0	0	0	0	0	0	0	T		664									T			664									T
665	0	0	0	0	0	0	0	0	E			665	0	0	0	0	0	0	0	0	E		665									E			665									E
666	0	0	0	0	0	0	0	0	C			666	0	0	0	0	0	0	0	0	C		666									C			666									C
667	0	0	0	0	0	0	0	0	L			667	0	0	0	0	0	0	0	0	L		667									L			667									L
668	0.0100503	0.0301508	0.0201005	0.0452261	0.0653266	0.180905	0.256281	0.39196	A			668	0.00766413	0.0402746	0.0158346	0.0439166	0.0727095	0.174086	0.20292	0.442594	A		668	0.00238612	-0.0101239	0.00426589	0.00130949	-0.00738282	0.0068184	0.0533612	-0.0506344	A			668	0.00238612	-0.0101239	0.00426589	0.00130949	-0.00738282	0.0068184	0.0533612	-0.0506344	A
669	0.0100503	0.0301508	0.0201005	0.0452261	0.0653266	0.180905	0.256281	0.39196	K			669	0.00766413	0.0402746	0.0158346	0.0439166	0.0727095	0.174086	0.20292	0.442594	K		669	0.00238612	-0.0101239	0.00426589	0.00130949	-0.00738282	0.0068184	0.0533612	-0.0506344	K			669	0.00238612	-0.0101239	0.00426589	0.00130949	-0.00738282	0.0068184	0.0533612	-0.0506344	K
670	0.0100503	0.0301508	0.0201005	0.0452261	0.0653266	0.180905	0.256281	0.39196	L			670	0.00766413	0.0402746	0.0158346	0.0439166	0.0727095	0.174086	0.20292	0.442594	L		670	0.00238612	-0.0101239	0.00426589	0.00130949	-0.00738282	0.0068184	0.0533612	-0.0506344	L			670	0.00238612	-0.0101239	0.00426589	0.00130949	-0.00738282	0.0068184	0.0533612	-0.0506344	L
671	0.0100503	0.0301508	0.0201005	0.0452261	0.0653266	0.180905	0.256281	0.39196	G			671	0.00766413	0.0402746	0.0158346	0.0439166	0.0727095	0.174086	0.20292	0.442594	G		671	0.00238612	-0.0101239	0.00426589	0.00130949	-0.00738282	0.0068184	0.0533612	-0.0506344	G			671	0.00238612	-0.0101239	0.00426589	0.00130949	-0.00738282	0.0068184	0.0533612	-0.0506344	G
672	0.0100503	0.0301508	0.0201005	0.0452261	0.0653266	0.180905	0.256281	0.39196	G			672	0.00766413	0.0402746	0.0158346	0.0439166	0.0727095	0.174086	0.20292	0.442594	G		672	0.00238612	-0.0101239	0.00426589	0.00130949	-0.00738282	0.0068184	0.0533612	-0.0506344	G			672	0.00238612	-0.0101239	0.00426589	0.00130949	-0.00738282	0.0068184	0.0533612	-0.0506344	G
673	0.0100503	0.0301508	0.0201005	0.0452261	0.0653266	0.180905	0.256281	0.39196	R			673	0.00766413	0.0402746	0.0158346	0.0439166	0.0727095	0.174086	0.20292	0.442594	R		673	0.00238612	-0.0101239	0.00426589	0.00130949	-0.00738282	0.0068184	0.0533612	-0.0506344	R			673	0.00238612	-0.0101239	0.00426589	0.00130949	-0.00738282	0.0068184	0.0533612	-0.0506344	R
674	0.0100503	0.0301508	0.0201005	0.0452261	0.0653266	0.180905	0.256281	0.39196	P			674	0.00766413	0.0402746	0.0158346	0.0439166	0.0727095	0.174086	0.20292	0.442594	P		674	0.00238612	-0.0101239	0.00426589	0.00130949	-0.00738282	0.0068184	0.0533612	-0.0506344	P			674	0.00238612	-0.0101239	0.00426589	0.00130949	-0.00738282	0.0068184	0.0533612	-0.0506344	P
675	0.0100503	0.0301508	0.0201005	0.0452261	0.0653266	0.180905	0.256281	0.39196	T			675	0.00766413	0.0402746	0.0158346	0.0439166	0.0727095	0.174086	0.20292	0.442594	T		675	0.00238612	-0.0101239	0.00426589	0.00130949	-0.00738282	0.0068184	0.0533612	-0.0506344	T			675	0.00238612	-0.0101239	0.00426589	0.00130949	-0.00738282	0.0068184	0.0533612	-0.0506344	T
676	0.0100503	0.0301508	0.0201005	0.0452261	0.0653266	0.180905	0.256281	0.39196	Y			676	0.00766413	0.0402746	0.0158346	0.0439166	0.0727095	0.174086	0.20292	0.442594	Y		676	0.00238612	-0.0101239	0.00426589	0.00130949	-0.00738282	0.0068184	0.0533612	-0.0506344	Y			676	0.00238612	-0.0101239	0.00426589	0.00130949	-0.00738282	0.0068184	0.0533612	-0.0506344	Y
677	0.0100503	0.0301508	0.0201005	0.0452261	0.0653266	0.180905	0.256281	0.39196	E			677	0.00766413	0.0402746	0.0158346	0.0439166	0.0727095	0.174086	0.20292	0.442594	E		677	0.00238612	-0.0101239	0.00426589	0.00130949	-0.00738282	0.0068184	0.0533612	-0.0506344	E			677	0.00238612	-0.0101239	0.00426589	0.00130949	-0.00738282	0.0068184	0.0533612	-0.0506344	E
678	0.0332226	0.0631229	0.109635	0.0830565	0.112957	0.152824	0.20598	0.239203	E			678	0.0226485	0.0798221	0.072766	0.106083	0.133158	0.150287	0.182415	0.252821	E		678	0.0105741	-0.0166991	0.0368685	-0.0230267	-0.0202011	0.00253706	0.0235652	-0.013618	E			678	0.0105741	-0.0166991	0.0368685	-0.0230267	-0.0202011	0.00253706	0.0235652	-0.013618	E
679	0.0465116	0.0797342	0.186047	0.136213	0.146179	0.116279	0.142857	0.146179	Y			679	0.0294806	0.0991992	0.101598	0.135958	0.163445	0.13666	0.167903	0.165757	Y		679	0.017031	-0.019465	0.0844488	0.000254461	-0.0172652	-0.0203813	-0.0250455	-0.0195772	Y			679	0.017031	-0.019465	0.0844488	0.000254461	-0.0172652	-0.0203813	-0.0250455	-0.0195772	Y
680	0.0465116	0.0797342	0.186047	0.136213	0.146179	0.116279	0.142857	0.146179	L			680	0.0294806	0.0991992	0.101598	0.135958	0.163445	0.13666	0.167903	0.165757	L		680	0.017031	-0.019465	0.0844488	0.000254461	-0.0172652	-0.0203813	-0.0250455	-0.0195772	L			680	0.017031	-0.019465	0.0844488	0.000254461	-0.0172652	-0.0203813	-0.0250455	-0.0195772	L
681	0.0465116	0.0797342	0.186047	0.136213	0.146179	0.116279	0.142857	0.146179	G			681	0.0294806	0.0991992	0.101598	0.135958	0.163445	0.13666	0.167903	0.165757	G		681	0.017031	-0.019465	0.0844488	0.000254461	-0.0172652	-0.0203813	-0.0250455	-0.0195772	G			681	0.017031	-0.019465	0.0844488	0.000254461	-0.0172652	-0.0203813	-0.0250455	-0.0195772	G
682	0.0465116	0.0797342	0.186047	0.136213	0.146179	0.116279	0.142857	0.146179	T			682	0.0294806	0.0991992	0.101598	0.135958	0.163445	0.13666	0.167903	0.165757	T		682	0.017031	-0.019465	0.0844488	0.000254461	-0.0172652	-0.0203813	-0.0250455	-0.0195772	T			682	0.017031	-0.019465	0.0844488	0.000254461	-0.0172652	-0.0203813	-0.0250455	-0.0195772	T
683	0.0465116	0.0797342	0.186047	0.136213	0.146179	0.116279	0.142857	0.146179	E			683	0.0294806	0.0991992	0.101598	0.135958	0.163445	0.13666	0.167903	0.165757	E		683	0.017031	-0.019465	0.0844488	0.000254461	-0.0172652	-0.0203813	-0.0250455	-0.0195772	E			683	0.017031	-0.019465	0.0844488	0.000254461	-0.0172652	-0.0203813	-0.0250455	-0.0195772	E
684	0.039801	0.0746269	0.20398	0.149254	0.164179	0.114428	0.134328	0.119403	Y			684	0.0183201	0.0931902	0.0747539	0.136839	0.186772	0.147327	0.169608	0.17319	Y		684	0.0214809	-0.0185633	0.129226	0.0124144	-0.0225927	-0.0328994	-0.0352794	-0.0537868	Y			684	0.0214809	-0.0185633	0.129226	0.0124144	-0.0225927	-0.0328994	-0.0352794	-0.0537868	Y
685	0.040404	0.0808081	0.252525	0.20202	0.161616	0.0808081	0.0808081	0.10101	V			685	0	0	0	0	0	0	0	0	V		685									V			685									V
686	0.040404	0.0808081	0.252525	0.20202	0.161616	0.0808081	0.0808081	0.10101	T			686	0	0	0	0	0	0	0	0	T		686									T			686									T
687	0.040404	0.0808081	0.252525	0.20202	0.161616	0.0808081	0.0808081	0.10101	A			687	0	0	0	0	0	0	0	0	A		687									A			687									A
688	0	0	0	0	0	0	0	0	I			688	0	0	0	0	0	0	0	0	I		688									I			688									I
689	0	0	0	0	0	0	0	0	A			689	0	0	0	0	0	0	0	0	A		689									A			689									A
690	0	0	0	0	0	0	0	0	N			690	0	0	0	0	0	0	0	0	N		690									N			690									N
691	0	0	0	0	0	0	0	0	L			691	0	0	0	0	0	0	0	0	L		691									L			691									L
692	0	0	0	0	0	0	0	0	K			692	0	0	0	0	0	0	0	0	K		692									K			692									K
693	0	0	0	0	0	0	0	0	K			693	0	0	0	0	0	0	0	0	K		693									K			693									K
694	0	0	0	0	0	0	0	0	C			694	0	0	0	0	0	0	0	0	C		694									C			694									C
695	0	0	0	0	0	0	0	0	S			695	0	0	0	0	0	0	0	0	S		695									S			695									S
696	0	0	0	0	0	0	0	0	T			696	0	0	0	0	0	0	0	0	T		696									T			696									T
697	0	0	0	0	0	0	0	0	S			697	0	0	0	0	0	0	0	0	S		697									S			697									S
698	0	0	0	0	0	0	0	0	P			698	0	0	0	0	0	0	0	0	P		698									P			698									P
699	0	0	0	0	0	0	0	0	L			699	0	0	0	0	0	0	0	0	L		699									L			699									L
700	0	0	0	0	0	0	0	0	L			700	0	0	0	0	0	0	0	0	L		700									L			700									L
701	0.05	0.05	0.08	0.11	0.16	0.19	0.18	0.18	E			701	0	0	0	0	0	0	0	0	E		701									E			701									E
702	0.05	0.05	0.08	0.11	0.16	0.19	0.18	0.18	A			702	0	0	0	0	0	0	0	0	A		702									A			702									A
703	0.05	0.05	0.08	0.11	0.16	0.19	0.18	0.18	C			703	0	0	0	0	0	0	0	0	C		703									C			703									C
704	0.05	0.05	0.08	0.11	0.16	0.19	0.18	0.18	A			704	0	0	0	0	0	0	0	0	A		704									A			704									A
705	0.05	0.05	0.08	0.11	0.16	0.19	0.18	0.18	F			705	0	0	0	0	0	0	0	0	F		705									F			705									F
706	0	0	0	0	0	0	0	0	L			706	0	0	0	0	0	0	0	0	L		706									L			706									L
707	0	0	0	0	0	0	0	0	T			707	0	0	0	0	0	0	0	0	T		707									T			707									T
708	0	0	0	0	0	0	0	0	R			708	0	0	0	0	0	0	0	0	R		708									R			708									R
																							SUM	2.22754	-0.604487	8.87549	-3.08535	-6.649	1.55684	8.69012	-11.0112				SUM	2.22754	-0.604487	8.87549	-3.08535	-6.649	1.55684	8.69012	-11.0112
